# Supplementary material for: ADVANCE-TBI study protocol: traumatic brain injury outcomes in UK military personnel serving in Afghanistan between 2003 and 2014 – a longitudinal cohort study
Source: PubMed Central journal article supplement — BMJ Open. 2023 Mar 21;13(3):e069243. doi: 10.1136/bmjopen-2022-069243 (PMC10032415; doi:10.1136/bmjopen-2022-069243), 2023-03-21
Supplement: bmjopen-2022-069243.draft_revisions.pdf [file bmjopen-2022-069243.draft_revisions.pdf]

# BMJ Open

BMJ Open is committed to open peer review. As part of this commitment we make the peer review history of every article we publish publicly available.

When an article is published we post the peer reviewers' comments and the authors' responses online. We also post the versions of the paper that were used during peer review. These are the versions that the peer review comments apply to.

The versions of the paper that follow are the versions that were submitted during the peer review process. They are not the versions of record or the final published versions. They should not be cited or distributed as the published version of this manuscript.

BMJ Open is an open access journal and the full, final, typeset and author-corrected version of record of the manuscript is available on our site with no access controls, subscription charges or pay-per-view fees (<http://bmjopen.bmj.com>).

If you have any questions on BMJ Open's open peer review process please email [info.bmjopen@bmj.com](mailto:info.bmjopen@bmj.com)

# BMJ Open

## The ADVANCE-TBI study protocol: a longitudinal cohort study of traumatic brain injury outcomes in UK military personnel serving in Afghanistan between 2003 and 2014

|                               |                                                                                                                                                                                                                                                                                                                                                                                                                                                                                                                                                                                                                                                                                                                                                                                                                                                                                                                                                                                                                                                                                                                                                                                                                                                                                                                                                                                                                                                                                                                                                                                                                                                                                                                                                                                                                                                                                                                                                                                                                                                                                                                                                                                                                                                                        |
|-------------------------------|------------------------------------------------------------------------------------------------------------------------------------------------------------------------------------------------------------------------------------------------------------------------------------------------------------------------------------------------------------------------------------------------------------------------------------------------------------------------------------------------------------------------------------------------------------------------------------------------------------------------------------------------------------------------------------------------------------------------------------------------------------------------------------------------------------------------------------------------------------------------------------------------------------------------------------------------------------------------------------------------------------------------------------------------------------------------------------------------------------------------------------------------------------------------------------------------------------------------------------------------------------------------------------------------------------------------------------------------------------------------------------------------------------------------------------------------------------------------------------------------------------------------------------------------------------------------------------------------------------------------------------------------------------------------------------------------------------------------------------------------------------------------------------------------------------------------------------------------------------------------------------------------------------------------------------------------------------------------------------------------------------------------------------------------------------------------------------------------------------------------------------------------------------------------------------------------------------------------------------------------------------------------|
| Journal:                      | <i>BMJ Open</i>                                                                                                                                                                                                                                                                                                                                                                                                                                                                                                                                                                                                                                                                                                                                                                                                                                                                                                                                                                                                                                                                                                                                                                                                                                                                                                                                                                                                                                                                                                                                                                                                                                                                                                                                                                                                                                                                                                                                                                                                                                                                                                                                                                                                                                                        |
| Manuscript ID                 | bmjopen-2022-069243                                                                                                                                                                                                                                                                                                                                                                                                                                                                                                                                                                                                                                                                                                                                                                                                                                                                                                                                                                                                                                                                                                                                                                                                                                                                                                                                                                                                                                                                                                                                                                                                                                                                                                                                                                                                                                                                                                                                                                                                                                                                                                                                                                                                                                                    |
| Article Type:                 | Protocol                                                                                                                                                                                                                                                                                                                                                                                                                                                                                                                                                                                                                                                                                                                                                                                                                                                                                                                                                                                                                                                                                                                                                                                                                                                                                                                                                                                                                                                                                                                                                                                                                                                                                                                                                                                                                                                                                                                                                                                                                                                                                                                                                                                                                                                               |
| Date Submitted by the Author: | 14-Oct-2022                                                                                                                                                                                                                                                                                                                                                                                                                                                                                                                                                                                                                                                                                                                                                                                                                                                                                                                                                                                                                                                                                                                                                                                                                                                                                                                                                                                                                                                                                                                                                                                                                                                                                                                                                                                                                                                                                                                                                                                                                                                                                                                                                                                                                                                            |
| Complete List of Authors:     | <p>Graham, Neil; Imperial College London, Department of Brain Sciences; UK Dementia Research Institute Centre for Care Research and Technology, Imperial College London</p> <p>Blissitt, Grace; Imperial College London; Defence Medical Rehabilitation Centre, Academic Department of Military Rehabilitation</p> <p>Zimmerman, Karl; Imperial College London, Department of Brain Sciences; UK Dementia Research Institute Centre for Care Research and Technology, Imperial College London</p> <p>Friedland, Daniel; Imperial College London, Department of Brain Sciences</p> <p>Dumas, Marc- Emmanuel; Imperial College London National Heart and Lung Institute; Imperial College London Department of Metabolism Digestion and Reproduction</p> <p>Coady, Emma; Imperial College London National Heart and Lung Institute; Defence Medical Rehabilitation Centre, Academic Department of Military Rehabilitation</p> <p>Heslegrave, Amanda; UCL Queen Square Institute of Neurology; UK Dementia Research Institute, University College London</p> <p>Zetterberg, Henrik; UCL Queen Square Institute of Neurology; UK Dementia Research Institute, University College London</p> <p>Escott-Price, Valentina; Cardiff University, Division of Psychological Medicine and Clinical Neurosciences, School of Medicine; UK Dementia Research Institute, Cardiff University</p> <p>Schofield, Susie; Imperial College London National Heart and Lung Institute</p> <p>Fear, Nicola; King's College London, King's Centre for Military Health Research; King's College London, Academic Department for Military Mental Health</p> <p>Boos, Christopher; Imperial College London National Heart and Lung Institute; King's College London, Academic Department for Military Mental Health</p> <p>Bull, Anthony; Imperial College London, Centre for Injury Studies; Imperial College London, Department of Bioengineering</p> <p>Cullinan, Paul; Imperial College London National Heart and Lung Institute</p> <p>Bennett, Alexander; Academic Department of Military Rehabilitation, Defence Medical Rehabilitation Centre; Imperial College London National Heart and Lung Institute</p> <p>Sharp, David; Imperial College London, Department of Brain Sciences;</p> |

1  
2  
3  
4  
5  
6  
7  
8  
9  
10  
11  
12  
13  
14  
15  
16  
17  
18  
19  
20  
21  
22  
23  
24  
25  
26  
27  
28  
29  
30  
31  
32  
33  
34  
35  
36  
37  
38  
39  
40  
41  
42  
43  
44  
45  
46  
47  
48  
49  
50  
51  
52  
53  
54  
55  
56  
57  
58  
59  
60

|           |                                                                                                                                                                                                                           |
|-----------|---------------------------------------------------------------------------------------------------------------------------------------------------------------------------------------------------------------------------|
|           | UK Dementia Research Institute Centre for Care Research and Technology, Imperial College London<br>the ADVANCE Study, On behalf of; Defence Medical Rehabilitation Centre, Academic Department of Military Rehabilitation |
| Keywords: | Neurology < INTERNAL MEDICINE, Dementia < NEUROLOGY, TRAUMA MANAGEMENT, Magnetic resonance imaging < RADIOLOGY & IMAGING, Neurological injury < NEUROLOGY, Neurosurgery < SURGERY                                         |
|           |                                                                                                                                                                                                                           |

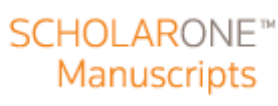

1  
2  
3 **The ADVANCE-TBI study protocol: a longitudinal cohort study of traumatic brain injury outcomes**  
4 **in UK military personnel serving in Afghanistan between 2003 and 2014**  
5  
6  
7

8  
9 **Authors**

10 Neil SN Graham<sup>1,2</sup>, Grace Blissitt<sup>3,4</sup>, Karl A Zimmerman<sup>1,2</sup>, Daniel Friedland<sup>1</sup>, Marc-Emmanuel  
11 Dumas<sup>3,5,6,7</sup>, Emma Coady<sup>3,4</sup>, Amanda Heslegrave<sup>8,9</sup>, Henrik Zetterberg<sup>8,9,10,11,12</sup>, Valentina  
12 Escott-Price<sup>13,14</sup>, Susie Schofield<sup>3</sup>, Nicola T Fear<sup>15,16</sup>, Christopher J Boos<sup>4,16,17,18</sup>, Anthony M J  
13 Bull<sup>19,20</sup>, Paul Cullinan<sup>3</sup>, Alexander Bennett<sup>4,3</sup> and David J Sharp<sup>1,2,19</sup> for the ADVANCE Study  
14  
15  
16  
17  
18

19 Affiliations:

- 20 1. Department of Brain Sciences, Imperial College London, UK  
21 2. UK Dementia Research Institute Centre for Care Research and Technology, Imperial College London  
22 3. National Heart and Lung Institute, Imperial College London, London, UK  
23 4. Academic Department of Military Rehabilitation, Defence Medical Rehabilitation Centre, Stanford Hall, Loughborough, UK  
24 5. Department of Metabolism, Digestion and Reproduction, Imperial College London, London, UK  
25 6. European Genomics Institute for Diabetes, U1283 INSERM / UMR 8199 CNRS, Institut Pasteur de Lille, Lille University Hospital, University  
26 of Lille, Lille, France  
27 7. McGill Genome Centre, McGill University, Montréal, Qc, Canada  
28 8. Department of Neurodegenerative Disease, UCL Institute of Neurology, Queen Square, London, UK  
29 9. UK Dementia Research Institute at UCL, London, UK  
30 10. Department of Psychiatry and Neurochemistry, Institute of Neuroscience and Physiology, the Sahlgrenska Academy at the University of  
31 Gothenburg, Mölndal, Sweden  
32 11. Clinical Neurochemistry Laboratory, Sahlgrenska University Hospital, Mölndal, Sweden  
33 12. Hong Kong Center for Neurodegenerative Diseases, Clear Water Bay, Hong Kong, China  
34 13. Division of Psychological Medicine and Clinical Neurosciences, School of Medicine, Cardiff University, UK  
35 14. UK Dementia Research Institute at Cardiff University, UK  
36 15. King's Centre for Military Health Research, King's College London, London, UK  
37 16. Academic Department for Military Mental Health, King's College London, London, UK  
38 17. Faculty of Health & Social Sciences, Bournemouth University, Bournemouth, UK  
39 18. Department of Cardiology, University Hospitals Dorset NHS Foundation Trust, Poole Hospital, Poole, UK  
40 19. Centre for Injury Studies, Imperial College London, London, UK  
41 20. Department of Bioengineering, Imperial College London, London, UK  
42  
43  
44  
45  
46  
47  
48  
49  
50  
51  
52  
53  
54  
55  
56  
57  
58  
59  
60

## Abstract

Introduction: Outcomes of traumatic brain injury (TBI) are highly variable, with cognitive and psychiatric problems often present in survivors, including an increased dementia risk in the long-term. Military personnel are at an increased occupational risk of TBI, with high rates of complex polytrauma including injuries characterising the recent UK campaign in Afghanistan. ADVANCE-TBI will describe the patterns, associations and long-term outcomes of TBI in the established ArmeD SerVices TrAuma and RehabilitatioN OutCome (ADVANCE) cohort.

Methods and Analysis: The ADVANCE cohort comprises 579 military personnel exposed to major battlefield trauma requiring medical evacuation, and 566 matched military personnel without major trauma. TBI exposure has been captured at baseline using a standardised interview and registry data, and will be refined at first follow-up visit with the Ohio State method. Participants will undergo blood sampling, MRI and detailed neuropsychological assessment longitudinally as part of their follow-up visits three-to-five yearly. Biomarkers of injury, neuroinflammation and degeneration will be quantified in blood, and polygenic risk scores calculated for neurodegeneration. Age-matched healthy volunteers will be recruited as controls for MRI analyses. We will describe TBI exposure across the cohort, relate this to advanced biomarkers of injury and clinical outcomes including cognitive performance, neuropsychiatric symptom burden and function. The influence of genotype will be assessed. This research will clarify the relationship between military head injury exposure and long-term outcomes, providing insights into underlying disease mechanisms and informing prevention interventions.

Ethics and Dissemination: The ADVANCE TBI study has received a favourable opinion the Ministry of Defence Research Ethics Committee (REF 2126/MODREC/22). Findings will be disseminated via publications in peer-reviewed journals and presentations at conferences.

### Strengths and limitations of the study

ADVANCE-TBI integrates with and extends the existing ADVANCE cohort study of 1145 military personnel with detailed longitudinal clinical, physiological, biomarker, genetic and functional assessment.

We are well powered to interrogate the relationship between TBI exposure, and long-term clinical with advanced biomarkers clarifying underlying disease mechanisms.

Results will inform public health prevention strategies in military, sporting and civilian settings, by identifying which types of injury pose the highest risks of progressive problems, and who might be at highest risk.

One limitation is that the ADVANCE cohort does not include female personnel, with further work ultimately needed to test the generalisability of findings

A degree of loss-to-follow-up is anticipated but with a very large sample, we expect to remain well-powered on key outcome measures.

## Introduction

Traumatic brain injury (TBI) is a major cause of morbidity and mortality worldwide.<sup>1</sup> Complex patterns of injury are produced by battlefield head injury with high rates of blast neurotrauma in recent UK campaigns in Afghanistan and Iraq.<sup>2</sup> Estimates of TBI rates vary depending on definition and ascertainment approaches, but are thought to affect 7.5 to 20% of service personnel.<sup>3,4</sup> Management of battlefield trauma has improved, such that patients are now surviving injuries and living with greater levels of disability.<sup>5</sup>

A range of neurological and psychiatric problems, including cognitive difficulties, may arise after TBI. These 'direct effects' of injury recover to a variable extent. However, there is also evidence that a proportion of patients will deteriorate late after trauma,<sup>6</sup> with an increased risk of all-subtype dementia associated with TBI.<sup>7</sup> Epidemiological data suggest a dose-response relationship, with greatest risk associated with more severe injuries, or repeated TBI.<sup>6-8</sup> There has been particular concern about chronic traumatic encephalopathy (CTE) in military veterans. This trauma-associated tauopathy is considered a progressive neurodegenerative disease and has been described in a number of combat veterans including after blast.<sup>9,10</sup> However, the relationship between the types, severity, quantity of head injuries and long-term brain health outcomes remain very uncertain.

Advances in neuroimaging and fluid biomarker technologies provide improved means to sensitively assess patients for the presence of TBI possible effects such as neurodegenerative disease, including in pre-symptomatic periods.<sup>11</sup> For example, diffusion tensor MRI is highly sensitive to white matter damage sustained during TBI, and may reveal changes which are not present on conventional imaging such as CT or standard MRI sequences.<sup>12</sup> In addition, single molecule array (Simoa) technology (a bead-based, digitalized version of enzyme-linked sandwich immunoassay) can quantify neuronal breakdown products in blood to sub-femtomolar ( $10^{-15}$ ) concentrations, with axonal marker neurofilament light (NfL) highly sensitive to axonal damage and progressive degeneration which can take place chronically after TBI.<sup>13</sup> Previous work has shown elevations in both NfL and astroglial activation marker GFAP years after TBI.<sup>14</sup> New approaches may also provide an improved understanding of the genetic factors influencing outcomes long after trauma. For instance, the apolipoprotein E  $\epsilon 4$  allele is a major genetic risk factor for late onset Alzheimer's disease and is linked to poor clinical

1  
2  
3 outcomes after TBI.<sup>15,16</sup> Polygenic risk scores (PRS) are able to include genetic risk loci such as  
4 *APOE*, and further incorporate a large range of risk polymorphisms identified in genome wide  
5 association studies (GWAS), to explain more phenotypic variance than traditional  
6 approaches.<sup>17 18</sup>  
7  
8  
9

10  
11 The prospective ADVANCE study of combat trauma outcomes was established to investigate  
12 the long-term health consequences of battlefield trauma in the UK Afghanistan campaign,  
13 'Operation Herrick', between 2002 and 2014.<sup>19</sup> In total 1145 military personnel, around half  
14 of whom were exposed to major battlefield trauma alongside frequency matched controls,  
15 have been recruited and undergone detailed baseline evaluation (Figure 1). This comprised  
16 comprehensive biological, psychological and social data ascertainment including the presence  
17 of head injury at time of trauma. The consortium has previously reported on cardiovascular  
18 changes related to battlefield trauma, with higher rates of metabolic syndrome associated  
19 with injury,<sup>20</sup> and adverse effects of combat trauma on mental health.<sup>21</sup> ADVANCE provides a  
20 unique opportunity to leverage recent scientific advances to clarify in detail the patterns of  
21 TBI arising from the Afghanistan campaign, defining longitudinally the neurological and  
22 psychiatric consequences of injury, and relating these to head injury exposures. This will  
23 provide key insights into disease mechanisms, inform strategies to prevent significant injury,  
24 improve prognostication, and facilitate the establishment of clinical trials to prevent  
25 progressive post-injury problems.  
26  
27  
28  
29  
30  
31  
32  
33  
34  
35  
36  
37  
38  
39  
40  
41  
42  
43  
44  
45  
46  
47  
48  
49  
50  
51  
52  
53  
54  
55  
56  
57  
58  
59  
60



## Methods and Analysis

We will investigate the long-term neurological, psychiatric and functional outcomes of UK armed services physical battlefield trauma patients with a history of TBI. We will describe the types, severity, and morbidity of TBI sustained by military personnel serving in Afghanistan. Additionally, we will describe patterns of brain damage using advanced MRI and relate this to the type of injury sustained (e.g. blast / gunshot / blunt force). We will investigate how the type of injury, patterns of TBI in neuroimaging and blood biomarker profiles relate to cognitive performance and assess whether post-traumatic outcomes are influenced by genetic liability to neurodegenerative disease.

## Participants

ADVANCE-TBI is a prospective longitudinal study which integrates closely with the existing ADVANCE cohort. All ADVANCE participants will be offered the opportunity to enrol into ADVANCE-TBI, which, in brief, adds a 3T MRI scan of brain and cognitive assessment to the usual follow-up visits (see Table 1). Initially this will be on two consecutive follow-up visits 3-5 years apart, which will be extended subject to funding. A small group (n=30) of volunteers with no history of frontline military service or brain injury will also be recruited to have a single MRI scan of brain.

## Core Research Questions

- 1) What is the prevalence of TBI in the ADVANCE cohort?
- 2) How does combat TBI relate to evidence of progressive neurodegeneration and brain health?
- 3) How do prior or subsequent TBI exposures, or periods of repeated head impact exposure influence long-term health?
- 4) Do genetic risk factors for neurodegeneration modulate relationships between injury and outcome?
- 5) What is the relative influence of genetic factors, and different environmental risk factors for poor brain health outcomes (e.g. cardiovascular health, and TBI) on neurodegeneration?

## Specific hypotheses

- (1) Compared to those with no history of TBI, patients after TBI will show MRI evidence of white matter damage, specifically reductions in diffusion imaging measures, including fractional anisotropy; and that this will predict poor long-term outcomes including progressive neurodegeneration
- (2) Compared to those with no history of TBI, patients after TBI will show evidence of brain atrophy, demonstrated by reduced brain volume on volumetric structural T1 MRI and increased brain atrophy rates on serial volumetric T1 MRI
- (3) Compared to those with no history of TBI, patients after TBI will show poorer cognitive performance on standardised neuropsychological testing
- (4) Compared to those with no history of TBI, patients after TBI will show higher symptom burden in respect of mood, anxiety and post-traumatic stress
- (5) Compared to those with no history of TBI, patients after TBI will show increased concentrations of plasma biomarkers of trauma in blood, including neurofilament light (NfL) and glial fibrillary acidic protein (GFAP); and these biomarkers will predict progressive neurodegeneration
- (6) In patients with history of TBI, genetic risk for neurodegeneration will modulate the relationship between injury and biomarkers of neurodegeneration
- (7) Additional (prior or subsequent) TBI exposures will modify the relationship between index injury and neurodegeneration

### **Entry into the study**

Recruitment of the ADVANCE cohort began in March 2016. Defence Statistics provided information from which both groups were recruited. All ADVANCE cohort participants will be offered the opportunity to take part in the ADVANCE-TBI study. Assenting participants will be formally assessed for eligibility and invited to provide informed, written consent. The right of the participant to refuse consent without giving reasons will be respected. Further, the participant will remain free to withdraw from the study and withdraw previously collected data, at any time without giving reasons and without prejudicing any further treatment. A copy of the consent will be given to the participant, and one filed in the Trial Master File, and

1  
2  
3 within their MoD medical records (if still serving). The written consent will be taken by an  
4 authorised clinician.  
5  
6

7  
8 Inclusion / Exclusions: Core ADVANCE inclusion criteria are described in detail elsewhere.<sup>19</sup>  
9 Briefly, they comprise UK Armed services personnel; male; sustaining physical battlefield  
10 trauma, while on deployment in Afghanistan, requiring aeromedical evacuation and direct UK  
11 hospital admission from 2003 to 2014. This comprises an 'exposed group', exposed to major  
12 battlefield trauma, though not necessarily TBI. A frequency matched 'unexposed group' was  
13 also recruited in ADVANCE, without major battlefield trauma requiring aeromedical  
14 evacuation. The following are excluded from ADVANCE: females; those unwilling or unable to  
15 give informed consent; those with established CVD (previous stroke or transient ischaemic  
16 attack, ischaemic heart disease, peripheral vascular disease); past medical history of diabetes;  
17 past medical history of renal or liver disease; Aged <18 or >50 years at recruitment; active  
18 acute infection with systemic features of sepsis, at the time of recruitment. Participants are  
19 also excluded from the MRI part of ADVANCE-TBI if there is a contraindication to this imaging  
20 modality, e.g. due to ferromagnetic implants. We anticipate this will comprise only a very  
21 small number of individuals.  
22  
23  
24  
25  
26  
27  
28  
29  
30  
31  
32

33  
34 Assessment timeline and content: TBI-specific assessments will be integrated into the existing  
35 schedule of longitudinal follow-ups in the ADVANCE study. Specifically, this comprises  
36 assessments at baseline (complete in 1145 participants), ongoing assessments at 3 years  
37 (complete in circa 850 participants), as well as 7, 10, 15 and 20 years after recruitment into  
38 ADVANCE. The TBI assessments, in consenting participants, start at their next scheduled  
39 ADVANCE study visit. Recruitment started in May 2022, with approximately 150 participants  
40 enrolled in ADVANCE-TBI so far (Figure 2).  
41  
42  
43  
44  
45  
46  
47

#### 48 *Healthy volunteer assessment*

49

50  
51 We will recruit thirty age-matched non-ADVANCE healthy volunteers with no history of  
52 frontline military service for a single brain MRI scan (3T MRI on Philips Ingenia Elition, scan  
53 protocol identical to the other study participants). This is to assist interpretation and broader  
54 comparison of the imaging measures acquired in ADVANCE participants. This will be done  
55 cross-sectionally. Age matching will be performed to ensure equal proportions in 10 year age  
56  
57  
58  
59  
60

bands, compared with patients. These participants will be recruited via email circulation, word of mouth, and advertisement material in the form of posters. Healthy volunteer participants may include civilian contractors and MOD health professionals who have not been exposed to combat environments.

Inclusions for non-ADVANCE healthy volunteers: age range as per the ADVANCE cohort. Exclusion criteria are: females, unable to have MRI e.g., due to ferromagnetic implants, those with established vascular disease (previous stroke or transient ischaemic attack, ischaemic heart disease, peripheral vascular disease); past medical history of diabetes; past medical history of renal or liver disease, history of major head injury, defined as any head injury requiring ED attendance or any injury defined as moderate-severe in Mayo classification <sup>22</sup>, history of playing collision sports (Association or American Football, rugby, lacrosse, boxing, mixed martial arts) at a semi-professional or professional level, including high-level university sport participation, head injury in last 3 months or a history of frontline military service.

### **Identification of injuries, severity ascertainment, periods of repeated head impact exposure**

We will use standardised tools to capture and code the numbers, type, severity and sequelae of head injuries within the cohort. NINDS common data elements for traumatic brain injury research will be used where possible to code this information,<sup>23</sup> facilitating standardised comparisons and later sharing of data.

A standardised interview was used at the baseline study visit to capture the participant's medical history including of TBI, recorded on the past medical history page of the ADVANCE study case report form. Supplementing this the UK Aeromedical Evacuation and Joint Theatre Trauma Registry (JTTR) provides further detailed information about the acute injury and its early management. Lastly, review of the military medical records will be used to help complete any missing data regarding the TBI exposure and its early management. These are sources to which the ADVANCE study already has ethical approval to use and access in place.

The Ohio State TBI Identification Method <sup>24</sup> is being used at the first follow-up visit in ADVANCE, providing self-reported retrospective assessment of TBI exposure. This validated

1  
2  
3 tool provides information about significant injuries (or ‘concussions’) during each person’s life  
4 course, as well as capturing periods of time when that individual had frequent exposure to  
5 head injuries (such as for example, participation for several years as a boxer). Any information  
6 captured within the Ohio State questionnaire pertaining to the index injury will be  
7 incorporated as above.  
8  
9  
10  
11

12  
13 We will characterise the trauma exposure by which the patient was defined as ‘trauma  
14 exposed’ for the purpose of the advance study (i.e. event requiring aeromedical evacuation  
15 from Afghanistan). For clarity, we term this the ‘index’ injury, in recognition that individuals  
16 may have had prior, or subsequent to that which helped to define them as exposed for the  
17 purpose of the ADVANCE study. We will identify groups of participants based on the presence  
18 of TBI, associated polytrauma, or no trauma at the index event (Table 2).  
19  
20  
21  
22  
23

24  
25 We will use the Mayo classification to define injury severity and stratify the TBI group.<sup>22</sup> This  
26 classification approach categorises injury severity and provides a level of confidence about  
27 the categorisation, with three broad groups: symptomatic possible, mild probable, and  
28 moderate-severe (definite). Different categories of information are incorporated to  
29 determine a categorisation, and not all data types are required in any individual case. These  
30 include clinical features such as duration of post traumatic amnesia, imaging findings such as  
31 the presence of intraparenchymal haematoma, and or symptoms such as dizziness (Table 3).  
32  
33  
34  
35  
36  
37  
38

39 We will also identify non-index injury exposures to TBI and classify these using the Mayo  
40 classification, providing a count of moderate-severe and mild probable injuries. Periods of  
41 exposure to repeated head impacts, such as in sporting settings will also be assessed and  
42 quantified using the Ohio State method. This will define periods of exposure to repeated head  
43 impacts, capturing type (for instance, type of sport), and duration of exposure.  
44  
45  
46  
47  
48  
49  
50  
51

### 52 *Associations of trauma-related imaging change*

53  
54

55 Given the possibility that traumatic injuries may not have been recognised clinically, such as  
56 in the context of marked polytrauma with severe injuries elsewhere to the body, we will  
57 define a group of participants with trauma-related change on MRI scanning and compare  
58  
59  
60

1  
2  
3 these individuals to those without trauma-related abnormalities on imaging. Features used  
4 to define this group may include diffuse vascular injury on susceptibility weighted imaging  
5 MRI (i.e. microhaemorrhages); evidence of diffuse axonal injury on diffusion tensor imaging,  
6  
7 focal trauma related damage on structural imaging.  
8  
9

10  
11 We will assess for differences including in demographics, occupational exposure, and  
12 recorded trauma exposures between these groups. Although we will not be able to accurately  
13 date the changes on imaging to the index injury versus other events, this will provide an  
14 indication of rates of un-recognised radiologically significant TBI within the cohort.  
15  
16  
17  
18  
19

### 20 21 22 **Assessments during study visits**

#### 23 24 *Magnetic resonance imaging (MRI)*

25  
26 Brain structure and function will be assessed using MRI (Phillips 3T Ingenia Elition). Volumetric  
27 T1 will provide brain morphometric data and indicate the presence of any  
28 neurodegeneration-associated brain atrophy; fluid attenuated inversion recovery (FLAIR)  
29 sequences are acquired to assess specifically for post-traumatic change, including gliosis;  
30 diffusion weighted imaging will be acquired to facilitate diffusion tensor imaging (DTI)  
31 assessment of white matter tract integrity; susceptibility weighted imaging (SWI) to assess  
32 evidence of diffuse vascular injury sustained at the time of trauma; and resting state  
33 functional MRI to assess the effect of injury on brain network function. The scan duration is  
34 approximately 1 hour (Table 4).  
35  
36  
37  
38  
39  
40  
41  
42  
43  
44  
45

46 Scanning will be performed on one occasion for healthy volunteers, and longitudinally for  
47 ADVANCE participants, within the existing longitudinal study visit schedule. We anticipate  
48 that all scanning will take place within the radiology department at DMRC Stanford Hall. All  
49 images will be reported by a consultant neuroradiologist and the imaging reports reviewed  
50 by the ADVANCE-TBI study doctors.  
51  
52  
53  
54  
55  
56  
57  
58  
59  
60

1  
2  
3 *Neuropsychology, including symptoms associated with TBI, including post-traumatic stress*  
4 *symptoms, sleep quality, anxiety symptoms, depressive symptoms, and quality of life*  
5  
6  
7

8 Prior to testing patients will be asked duration of education, first language, whether they had  
9 any reading, writing, or spelling difficulties at school, or whether they have colour blindness.  
10 The assessments will be conducted by appropriately trained study researchers, overseen by  
11 a neuropsychologist. Cognitive function will be assessed using gold-standard pen and paper  
12 neuropsychological tests, alongside computerised testing of measures such as reaction times  
13 and processing speed via an established platform 'Cognitron'<sup>25</sup>. Tests are designed to map a  
14 range of areas including premorbid functioning, memory, processing speed, executive  
15 functioning, and performance validity (Table 5).  
16  
17  
18  
19  
20  
21  
22

23 The ADVANCE study routinely ascertains validated questionnaires to assess for a range of  
24 symptoms relevant to the chronic phase after TBI. A broad range of post-concussion  
25 symptoms are assessed using the Rivermead questionnaire<sup>26</sup> and we will acquire information  
26 on sleep quality using the Insomnia Severity Index<sup>27</sup>. Neuropsychiatric symptoms, including  
27 anxiety (using the GAD 7 questionnaire<sup>28</sup>), post-traumatic stress symptoms (PCL 5  
28 questionnaire<sup>29</sup>). Healthy-related quality of life will be assessed using the validated EQ 5D 5l  
29 questionnaire<sup>30</sup> which assesses five dimensions, spanning mobility, self-care, usual activities,  
30 pain/discomfort and anxiety/ depression. These measures are collected at present within the  
31 core ADVANCE study (Table 6).  
32  
33  
34  
35  
36  
37  
38  
39  
40  
41  
42  
43

44 *Cognition: Neuropsychological performance across pen and paper testing, and computerised*  
45 *measures*  
46  
47

48 We will assess baseline IQ using the test of premorbid functioning. We will use the Delis-  
49 Kaplan Executive Function System (DKEFS) Stroop test and Trail Making test to assess  
50 executive function. The Pearson Repeatability Battery for the Assessment of  
51 Neuropsychological Status (RBANS) test<sup>31</sup> will be used to assess a range of cognitive domains,  
52 including memory, delay recall, visuospatial, language and attentional performance. The Dot  
53 Counting test will be used to assess performance validity.<sup>32</sup> Two tests will be undertaken using  
54  
55  
56  
57  
58  
59  
60

1  
2  
3 a computerised platform 'Cognitron' on an Apple iPad system<sup>33</sup>. These are the simple reaction  
4 time test, and choice reaction team, providing reaction time and processing speed measures.  
5  
6  
7  
8  
9

## 10 **Sample size**

11  
12  
13 The sample size of the ADVANCE cohort has already been established,<sup>19</sup> and as per a number  
14 of existing assessments which form part of the core ADVANCE study (e.g. universal DEXA  
15 scanning, hip/knee/pelvic x-rays), we intend to offer ADVANCE-TBI to all participants.<sup>19</sup> The  
16 primary outcomes are (1) ascertainment of exposure to head injury across the ADVANCE  
17 cohort and (2) diffusion tensor imaging MRI difference in white matter integrity between  
18 patients with, and without history of TBI. The first outcome is descriptive rather than  
19 hypothesis driven.  
20  
21  
22  
23  
24  
25

26  
27 We anticipate uptake in the region of 80% resulting in a group of around 900 participants. A  
28 conservative estimate of TBI rates within the cohort from previous literature of 7.5%.<sup>3,4</sup> This  
29 equates to around 68 individuals with TBI: however the number is likely to be higher as  
30 ADVANCE specifically enrolled patients with major trauma exposure (in ~50%). We will be  
31 able to provide a detailed description of the types, quantity and severity of injury across the  
32 cohort.  
33  
34  
35  
36  
37  
38

39  
40 Detection of significant trauma-related abnormalities on diffusion tensor MRI: our previous  
41 work has shown a very substantial difference in white matter fractional anisotropy on DTI MRI  
42 in the chronic phase after moderate-severe TBI versus healthy age-matched controls (Cohen's  
43  $d=2.2$ ).<sup>34</sup> Power calculations (G\*Power, version 3.1) show that to have 95% power using a  
44 two-tailed t test to detect an effect of this magnitude, with an alpha error probability of 5%,  
45 a minimum of seven patients per study arm would be needed. Assuming an 80% enrolment  
46 of the cohort,  $n=900$  people, half of whom i.e. 450 have combat trauma exposure, we expect  
47 circa 10% to have TBI ( $n=45$ ). We are therefore well powered to detect differences in white  
48 matter integrity between patients with combat trauma including, and excluding TBI (given a  
49 requirement of 7 patients).  
50  
51  
52  
53  
54  
55  
56  
57  
58  
59  
60



## Analysis Overview

*Neuroimaging: white matter injury ascertainment using diffusion tensor imaging MRI and diffuse vascular injury on susceptibility weighted imaging*

We will use neuroimaging to identify white matter abnormalities associated with diffuse axonal and diffuse vascular injury. Standard approaches such as tract-based spatial statistic (FSL) will be used to generate measures of white matter integrity voxelwise for study participants undergoing imaging, generating measures such as fractional anisotropy (FA).<sup>35</sup> We will perform voxelwise analyses to identify regions of significantly different FA related to TBI exposure.

As previously described, using healthy age-matched controls with no history of frontline military service for comparison, we will produce individual-level white matter DTI assessments for ADVANCE participants. This pipeline involves FA assessment within regions previously shown to be sensitive to trauma-related damage, including whole brain white matter skeleton, body, genu and splenium of the corpus callosum, the corona radiata (left and right), corticospinal tracts, inferior longitudinal fasciculi, and middle cerebellar peduncles.<sup>12</sup> Susceptibility weighted imaging will be used to identify trauma-related diffuse vascular injury.<sup>36</sup> A neuroradiologist will report the scans and comment on any abnormalities, including microhaemorrhage burden.

*Neuroimaging: brain atrophy rate, determined by brain volume change on serial volumetric MRI*

Neurodegeneration can be sensitively measured with volumetric T1 MRI, with atrophy measures shown to correspond to neuronal numbers.<sup>37</sup> Longitudinal methods provide the means to look sensitively for progression over time.<sup>38</sup> Standard tools such as SPM (UCL) will be used to segment structural T1 images and calculate volumes of grey matter, white matter and cerebrospinal fluid (CSF) for each individual at each scanning timepoint. Volumes of grey matter (GM), white matter (WM), and CSF (CSF) will be normalised for head size as needed by dividing each by total intracranial volume (defined as GM+WM+CSF).

1  
2  
3 To assess for longitudinal changes in brain volume we will use standard approaches such as  
4 SPM 12 for longitudinal pairwise registration, whereby each patient's baseline scan is  
5 iteratively co-registered to the follow-up image.<sup>39</sup> The resulting deformations divided by the  
6 inter-scan time interval, are captured in a Jacobian determinant rate map. By registering  
7 individual temporal-average space images to standard space (e.g. MNI152), we will be able to  
8 undertake voxelwise group-level contrasts (FSL randomise), including between participants  
9 with and without TBI.  
10  
11  
12  
13  
14  
15  
16  
17  
18  
19

### 20 *Neuroimaging: brain network changes on resting state functional MRI*

21  
22 We will use functional MRI to investigate brain network function. Brain-activation related  
23 changes in cerebral blood flow can be assessed using functional MRI via the blood oxygen level  
24 dependent (BOLD) signal. Functional connectivity, reflecting both regional activation and the  
25 interaction of brain regions within a network, relates to brain structure (as above), is sensitive  
26 to TBI-related damage and can be assessed at rest using standard approaches: we have  
27 previously used this approach to demonstrate persistent changes in brain network functional  
28 connectivity after TBI.<sup>40</sup> Similar approaches will be employed to test whether battlefield  
29 exposure is associated with persistent changes in brain network function.  
30  
31  
32  
33  
34  
35  
36  
37  
38  
39  
40

### 41 *Fluid biomarkers: blood concentrations of neurodegeneration markers neurofilament light* 42 *(NfL) and glial fibrillary acidic protein (GFAP), with exploratory analyses of amyloid beta 1-42* 43 *and 1-40, ptau181 and total tau*

44  
45  
46  
47 Plasma has been taken at the baseline visit for >1100 participants in ADVANCE and thus far a  
48 substantial proportion of the cohort have undergone their 3-year longitudinal follow-up visit  
49 with further plasma sampling. This will continue longitudinally at each ADVANCE study visit.  
50 We will use a digital ELISA platform, specifically the single molecular array system (SiMoA)  
51 (Quanterix, MA)<sup>41</sup> to provide attomolar ( $10^{-15}$ ) quantification of fluid biomarkers. We will  
52 assess the relationship between plasma concentrations of NfL and GFAP and injury exposure  
53 using linear models. In exploratory analyses we will also investigate the relationship between  
54  
55  
56  
57  
58  
59  
60

1  
2  
3 injury and plasma concentrations of amyloid beta 1-42, amyloid beta 1-40, total tau and  
4 phospho-tau 181. Other plasma biomarkers of brain injury and neurodegeneration will be  
5 analysed in the future as they are developed.  
6  
7  
8  
9  
10  
11

12 *Fluid biomarkers: proteomic profile associated with traumatic brain injury*

13  
14  
15 The Somalogic proteomics discovery platform providing aptamer-based quantification of  
16 >7000 proteins is being performed on baseline blood samples from the ADVANCE cohort  
17 within the core ADVANCE study. We will (1) describe the plasma concentrations of, and assess  
18 the correlation between fluid biomarkers measured on the Simoa platform and the Somalogic  
19 platform (specifically NfL, GFAP and total tau); (2) assess for proteomic evidence of  
20 neurodegeneration and inflammation which is specific to battlefield TBI, involving  
21 comparison of NfL, GFAP, IL6:IL10, IFNy:IL10 and TNFa:IL10 ratio in patients with and without  
22 TBI (3) perform data-driven determination of clusters associated with brain injury in trauma  
23 patients to assess which groups of co-correlating proteins maximally differentiate individuals  
24 with and without TBI in those exposed to battlefield trauma, using cluster and factor analysis  
25 approaches; (4) assess which proteomic markers are closely correlated with our core  
26 candidate markers of neurodegeneration (NfL, GFAP) in patients with TBI; (5) assess the  
27 relative contribution of injury and inflammation to autonomic dysfunction after TBI, using  
28 measures such as heart rate variability (assessed using the Vicorder system, Skidmore  
29 Medical, UK) alongside proteomic markers and lastly (6); assess how accelerated biological  
30 aging contributes to the chronic consequences of TBI, and if so, to what extent this is  
31 modulated by inflammation.  
32  
33  
34  
35  
36  
37  
38  
39  
40  
41  
42  
43  
44  
45  
46  
47  
48  
49

50 *Assessment of interaction between neurodegenerative genotype (APOE4, AD PRS), TBI status,*  
51 *and outcome measures including fluid biomarkers, brain atrophy, and symptom burden*

52  
53  
54  
55 Whole blood was sampled at the ADVANCE study baseline visit. Consent and ethical approval  
56 are in place for genotyping and further analyses. Extraction and microarray analysis: DNA will  
57 be extracted and SNP assessment will be performed using Illumina Global Screening Array.  
58  
59  
60

1  
2  
3 We will use the Illumina Neuro Consortium Array in addition, comprising an additional ~75K  
4 SNPs for variants associated with AD, Parkinson's and frontotemporal dementia.<sup>42</sup> Individuals  
5 and variants with a low call rate will be excluded from further analyses. We will also perform  
6 quality checks for genetic sex and remove individuals with a high degree of relatedness, and  
7 will check for ancestry using principal component analysis. The derived subpopulation  
8 structure in our data will be assessed against reference populations (e.g. UK Biobank) and  
9 non-Caucasian participants analysed separately.  
10  
11  
12  
13  
14  
15  
16

17 To increase power and improve signal resolution while limiting the genotyping costs, datasets  
18 will be harmonised, phased and imputed with the Next-Generation Genotype Imputation  
19 Service, facilitating prediction of SNPs that have not been directly tested (matching measured  
20 to reference haplotypes). *APOE* status will be imputed and data will undergo QC as recently  
21 described.<sup>43</sup> Individual PRSs will be generated as sums of the risk alleles weighted by SNP  
22 effect sizes from the most recent AD GWAS.<sup>44</sup> SNPs will be selected on a threshold of  $p \leq 0.5$   
23 for AD.<sup>18,43,45</sup> SNPs will be excluded if they have a linkage disequilibrium  $r^2 > 0.1$  with the most  
24 associated SNP in a 1megabase region. The PRS will be standardised using appropriate  
25 population cohorts. In exploratory work, we will assess for mutations in Wallerian  
26 degeneration pathways which might affect neurodegeneration after injury, particularly in the  
27 sterile alpha and Toll/interleukin-1 receptor motif-containing 1 *SARM1* gene.  
28  
29  
30  
31  
32  
33  
34  
35  
36  
37  
38  
39  
40

#### 41 **Statistical analysis plan**

42  
43

44 Across the different strands of work, data inspection and the Kolmogorov-Smirnov test will  
45 be used to assess normality of all continuous data. Group-level continuous data will be  
46 compared using the unpaired t-test for normally distributed data and the Wilcoxon test for  
47 non-parametric data. Analysis of variance will be used for three way comparisons. In addition,  
48 effect sizes and confidence intervals will be reported. Spearman's rank correlation will be  
49 used to assess correlations between Simoa and Somalogic biomarkers.  
50  
51  
52  
53  
54  
55

56 Multivariable linear regression will be used to develop a prediction model for  
57 neurodegeneration outcome measures such as brain atrophy rates, fluid biomarkers (GFAP  
58 and NfL), cognition and neuropsychiatric symptom burden. Models will include putative  
59  
60

1  
2  
3 predictors whose influence will be explored including exposure to TBI (including severity,  
4 number of TBIs), cardiovascular status (e.g. indexed by arterial stiffness measures collected  
5 in ADVANCE such as pulse wave velocity, or scores such as QRISK<sup>46</sup>), genetic risk for AD, age,  
6 and time since injury.  
7  
8  
9

10  
11 Multivariable linear (or logistic, for categorical measures, as appropriate) regression models  
12 will be used to test the association between exposure and outcomes, adjusting a priori for  
13 confounders. We will test the effects of non-index injuries.  
14  
15  
16

17  
18 Linear mixed effects models will be used to analyse time-course data such as longitudinally  
19 collected biomarker data (fixed effects) accounting within individual (random effects)  
20 repeated measures. We will account for confounders including rank as a surrogate of  
21 socioeconomic status, and age.  
22  
23  
24  
25

26 A two tailed P value <0.05 will be considered statistically significant for all comparisons,  
27 except where a strong prior hypothesis exists to justify one-tail testing (e.g. brain volume loss,  
28 rather than expansion, over time after TBI).  
29  
30  
31  
32  
33  
34  
35

### 36 **Ethics and Dissemination**

37  
38 The relevant ethical approvals have been granted by the Ministry of Defence Ethics  
39 Committee (MODREC) (REF:2126MODREC22). The study will be performed in accordance  
40 with the recommendations guiding ethical research involving human subjects adopted by the  
41 18th World Medical Association General Assembly, Helsinki, Finland, June 1964, amended at  
42 the 64th World Medical Association General Assembly, Fortaleza, Brazil, October 2013. The  
43 study will have minimal risk to the participants. Normal safety procedures including standard  
44 MRI safety checks (e.g. for ferromagnetic metal in the body) will be carried out prior to scans  
45 to minimise risk. MRI may be claustrophobic, and loud for some participants. Participants will  
46 be made as comfortable as possible and will be able to communicate with the radiographer  
47 throughout the scan. Should the participant wish to not continue, the scan will be stopped  
48 immediately.  
49  
50  
51  
52  
53  
54  
55  
56  
57  
58  
59  
60

### **Public and participant involvement**

The proposed work has been discussed and formulated with the ADVANCE participant group where there was widespread enthusiasm for the study, and agreement that the research set out in this protocol is needed, acceptable to the participants and feasible to perform.

### **Dissemination strategy**

Study findings will be disseminated through participant and stakeholder communications such as the regular ADVANCE participant newsletter and website, and more broadly via manuscripts in peer reviewed journals and presentations at scientific conferences.

### **Data sharing**

ADVANCE-TBI is an integral component of the broader ADVANCE study, hence the data obtained from the study will form part of the wider ADVANCE database and shall be shared among appropriate researchers upon reasonable request.

## References

1. Maas AIR, Menon DK, Adelson PD, et al. Traumatic brain injury: integrated approaches to improve prevention, clinical care, and research. *Lancet Neurol*. Dec 2017;16(12):987-1048. doi:10.1016/S1474-4422(17)30371-X
2. Goldstein LE, Fisher AM, Tagge CA, et al. Chronic traumatic encephalopathy in blast-exposed military veterans and a blast neurotrauma mouse model. Research Support, N.I.H., Extramural Research Support, Non-U.S. Gov't Research Support, U.S. Gov't, Non-P.H.S. *Science translational medicine*. May 16 2012;4(134):134ra60. doi:10.1126/scitranslmed.3003716
3. Rona RJ, Jones M, Fear NT, et al. Mild Traumatic Brain Injury in UK Military Personnel Returning From Afghanistan and Iraq: Cohort and Cross-sectional Analyses. *The Journal of Head Trauma Rehabilitation*. 2012;27(1):33-44. doi:10.1097/HTR.0b013e318212f814
4. Tanielian T, Jaycox HL. *Invisible Wounds of War Psychological and Cognitive Injuries, Their Consequences, and Services to Assist Recovery*. . 2008:1–499. RAND Centre for Military Health Policy Research
5. Penn-Barwell JG, Roberts SA, Midwinter MJ, Bishop JR. Improved survival in UK combat casualties from Iraq and Afghanistan: 2003-2012. *J Trauma Acute Care Surg*. May 2015;78(5):1014-20. doi:10.1097/TA.0000000000000580
6. McMillan TM, Teasdale GM, Weir CJ, Stewart E. Death after head injury: the 13 year outcome of a case control study. *J Neurol Neurosurg Psychiatry*. Aug 2011;82(8):931-5. doi:10.1136/jnnp.2010.222232
7. Li Y, Li Y, Li X, et al. Head Injury as a Risk Factor for Dementia and Alzheimer's Disease: A Systematic Review and Meta-Analysis of 32 Observational Studies. *PLoS One*. 2017;12(1):e0169650. doi:10.1371/journal.pone.0169650
8. Leung KK, Carr FM, Russell MJ, Bremault-Phillips S, Triscott JAC. Traumatic brain injuries among veterans and the risk of incident dementia: A systematic review & meta-analysis. *Age and Ageing*. 2022;51(1):afab194. doi:10.1093/ageing/afab194
9. Priemer DS, Iacono D, Rhodes CH, Olsen CH, Perl DP. Chronic Traumatic Encephalopathy in the Brains of Military Personnel. *N Engl J Med*. Jun 9 2022;386(23):2169-2177. doi:10.1056/NEJMoa2203199
10. Goldstein LE, Fisher AM, Tagge CA, et al. Chronic traumatic encephalopathy in blast-exposed military veterans and a blast neurotrauma mouse model. *Sci Transl Med*. May 16 2012;4(134):134ra60. doi:10.1126/scitranslmed.3003716

- 1  
2  
3 11. Graham NS, Sharp DJ. Understanding neurodegeneration after traumatic brain injury: from  
4 mechanisms to clinical trials in dementia. *J Neurol Neurosurg Psychiatry*. Sep 21  
5 2019;doi:10.1136/jnnp-2017-317557  
6  
7
- 8 12. Jolly AE, Balaet M, Azor A, et al. Detecting axonal injury in individual patients after Traumatic  
9 Brain Injury. *Brain*. 2021;144(1):92-113. doi:10.1093/brain/awaa372  
10
- 11 13. Graham NSN, Zimmerman KA, Moro F, et al. Axonal marker neurofilament light predicts  
12 long-term outcomes and progressive neurodegeneration after traumatic brain injury. *Science  
13 Translational Medicine*. 2021;13(613):eabg9922. doi:doi:10.1126/scitranslmed.abg9922  
14
- 15 14. Newcombe VFJ, Ashton NJ, Posti JP, et al. Post-acute blood biomarkers and disease  
16 progression in traumatic brain injury. *Brain*. 2022;145(6):2064-2076. doi:10.1093/brain/awac126  
17
- 18 15. McFadyen CA, Zeiler FA, Newcombe V, et al. Apolipoprotein E4 Polymorphism and  
19 Outcomes from Traumatic Brain Injury: A Living Systematic Review and Meta-Analysis. *J  
20 Neurotrauma*. Apr 15 2021;38(8):1124-1136. doi:10.1089/neu.2018.6052  
21
- 22 16. Sundstrom A, Nilsson LG, Cruts M, Adolfsson R, Van Broeckhoven C, Nyberg L. Increased risk  
23 of dementia following mild head injury for carriers but not for non-carriers of the APOE epsilon4  
24 allele. *Int Psychogeriatr*. Feb 2007;19(1):159-65. doi:10.1017/S1041610206003498  
25
- 26 17. Hayes JP, Logue MW, Sadeh N, et al. Mild traumatic brain injury is associated with reduced  
27 cortical thickness in those at risk for Alzheimer's disease. *Brain*. Mar 1 2017;140(3):813-825.  
28 doi:10.1093/brain/aww344  
29
- 30 18. Escott-Price V, Sims R, Bannister C, et al. Common polygenic variation enhances risk  
31 prediction for Alzheimer's disease. *Brain*. Dec 2015;138(Pt 12):3673-84. doi:10.1093/brain/awv268  
32
- 33 19. Bennett AN, Dyball DM, Boos CJ, et al. Study protocol for a prospective, longitudinal cohort  
34 study investigating the medical and psychosocial outcomes of UK combat casualties from the  
35 Afghanistan war: the ADVANCE Study. *BMJ Open*. Oct 30 2020;10(10):e037850.  
36 doi:10.1136/bmjopen-2020-037850  
37
- 38 20. Boos CJ, Schofield S, Cullinan P, et al. Association between combat-related traumatic injury  
39 and cardiovascular risk. *Heart*. Mar 2022;108(5):367-374. doi:dx.doi.org/10.1136/heartjnl-2021-  
40 320296  
41
- 42 21. Dyball D, Bennett AN, Schofield S, et al. Mental health outcomes of male UK military  
43 personnel deployed to Afghanistan and the role of combat injury: analysis of baseline data from the  
44 ADVANCE cohort study. *Lancet Psychiat*. Jul 2022;9(7):547-554. doi:10.1016/s2215-0366(22)00112-2  
45
- 46 22. Malec JF, Brown AW, Leibson CL, et al. The mayo classification system for traumatic brain  
47 injury severity. *J Neurotrauma*. Sep 2007;24(9):1417-24. doi:10.1089/neu.2006.0245  
48  
49  
50  
51  
52  
53  
54  
55  
56  
57  
58  
59  
60



- 1  
2  
3 23. Grinnon ST, Miller K, Marler JR, et al. National Institute of Neurological Disorders and Stroke  
4 Common Data Element Project - approach and methods. *Clin Trials*. Jun 2012;9(3):322-9.  
5  
6 doi:10.1177/1740774512438980  
7
- 8 24. Corrigan JD, Bogner J. Initial reliability and validity of the Ohio State University TBI  
9 Identification Method. *J Head Trauma Rehabil*. Nov-Dec 2007;22(6):318-29.  
10  
11 doi:10.1097/01.Htr.0000300227.67748.77  
12
- 13 25. Hampshire A, Trender W, Chamberlain SR, et al. Cognitive deficits in people who have  
14 recovered from COVID-19. *EClinicalMedicine*. 2021/09/01/ 2021;39:101044.  
15  
16 doi:<https://doi.org/10.1016/j.eclinm.2021.101044>  
17
- 18 26. King NS, Crawford S, Wenden FJ, Moss NEG, Wade DT. The Rivermead Post Concussion  
19 Symptoms Questionnaire: a measure of symptoms commonly experienced after head injury and its  
20 reliability. *Journal of Neurology*. 1995/09/01 1995;242(9):587-592. doi:10.1007/BF00868811  
21  
22
- 23 27. Morin CM, Belleville G, Bélanger L, Ivers H. The Insomnia Severity Index: psychometric  
24 indicators to detect insomnia cases and evaluate treatment response. *Sleep*. May 1 2011;34(5):601-  
25  
26 8. doi:10.1093/sleep/34.5.601  
27
- 28 28. Spitzer RL, Kroenke K, Williams JB, Löwe B. A brief measure for assessing generalized anxiety  
29 disorder: the GAD-7. *Arch Intern Med*. May 22 2006;166(10):1092-7.  
30  
31 doi:10.1001/archinte.166.10.1092  
32
- 33 29. Blevins CA, Weathers FW, Davis MT, Witte TK, Domino JL. The Posttraumatic Stress Disorder  
34 Checklist for DSM-5 (PCL-5): Development and Initial Psychometric Evaluation. *J Trauma Stress*. Dec  
35  
36 2015;28(6):489-98. doi:10.1002/jts.22059  
37
- 38 30. Herdman M, Gudex C, Lloyd A, et al. Development and preliminary testing of the new five-  
39 level version of EQ-5D (EQ-5D-5L). *Qual Life Res*. Dec 2011;20(10):1727-36. doi:10.1007/s11136-011-  
40  
41 9903-x  
42
- 43 31. Randolph C, Tierney MC, Mohr E, Chase TN. The Repeatable Battery for the Assessment of  
44 Neuropsychological Status (RBANS): preliminary clinical validity. *J Clin Exp Neuropsychol*. Jun  
45  
46 1998;20(3):310-9. doi:10.1076/jcen.20.3.310.823  
47
- 48 32. Booke K, Lu P, Herzberg D. *The dot counting test*. Western Psychological Services; 2002.  
49
- 50 33. Hampshire A, Trender W, Chamberlain SR, et al. Cognitive deficits in people who have  
51 recovered from COVID-19. *EClinicalMedicine*. 2021;39doi:10.1016/j.eclinm.2021.101044  
52
- 53 34. Graham NSN, Jolly A, Zimmerman K, et al. Diffuse axonal injury predicts neurodegeneration  
54 after moderate–severe traumatic brain injury. *Brain*. 2020;doi:10.1093/brain/awaa316  
55  
56  
57  
58  
59  
60

- 1  
2  
3 35. Smith SM, Jenkinson M, Johansen-Berg H, et al. Tract-based spatial statistics: voxelwise  
4 analysis of multi-subject diffusion data. *Neuroimage*. Jul 15 2006;31(4):1487-505.  
5  
6 doi:10.1016/j.neuroimage.2006.02.024  
7  
8 36. Jolly AE, Bălăeș M, Azor A, et al. Detecting axonal injury in individual patients after traumatic  
9 brain injury. *Brain*. 2020;144(1):92-113. doi:10.1093/brain/awaa372  
10  
11 37. Bobinski M, de Leon MJ, Wegiel J, et al. The histological validation of post mortem magnetic  
12 resonance imaging-determined hippocampal volume in Alzheimer's disease. *Neuroscience*.  
13 2000;95(3):721-5.  
14  
15 38. Cole JH, Jolly A, de Simoni S, et al. Spatial patterns of progressive brain volume loss after  
16 moderate-severe traumatic brain injury. *Brain*. Mar 1 2018;141(3):822-836.  
17  
18 doi:10.1093/brain/awx354  
19  
20 39. Ashburner J, Ridgway GR. Symmetric diffeomorphic modeling of longitudinal structural MRI.  
21 *Front Neurosci*. 2012;6:197. doi:10.3389/fnins.2012.00197  
22  
23 40. Sharp DJ, Beckmann CF, Greenwood R, et al. Default mode network functional and structural  
24 connectivity after traumatic brain injury. *BRAIN*. // 2011;134:2233-2247. doi:brain/awr175  
25  
26 41. Wilson DH, Rissin DM, Kan CW, et al. The Simoa HD-1 Analyzer: A Novel Fully Automated  
27 Digital Immunoassay Analyzer with Single-Molecule Sensitivity and Multiplexing. *J Lab Autom*. Aug  
28 2016;21(4):533-47. doi:10.1177/2211068215589580  
29  
30 42. Blauwendraat C, Faghri F, Pihlstrom L, et al. NeuroChip, an updated version of the NeuroX  
31 genotyping platform to rapidly screen for variants associated with neurological diseases. *Neurobiol*  
32 *Aging*. Sep 2017;57:247.e9-247.e13. doi:10.1016/j.neurobiolaging.2017.05.009  
33  
34 43. Leonenko G, Baker E, Stevenson-Hoare J, et al. Identifying individuals with high risk of  
35 Alzheimer's disease using polygenic risk scores. *Nature Communications*. 2021/07/23  
36 2021;12(1):4506. doi:10.1038/s41467-021-24082-z  
37  
38 44. Kunkle BW, Grenier-Boley B, Sims R, et al. Genetic meta-analysis of diagnosed Alzheimer's  
39 disease identifies new risk loci and implicates A $\beta$ , tau, immunity and lipid processing. *Nat Genet*. Mar  
40 2019;51(3):414-430. doi:10.1038/s41588-019-0358-2  
41  
42 45. Escott-Price V, Myers AJ, Huentelman M, Hardy J. Polygenic risk score analysis of  
43 pathologically confirmed Alzheimer disease. *Ann Neurol*. Aug 2017;82(2):311-314.  
44  
45 doi:10.1002/ana.24999  
46  
47 46. Hippisley-Cox J, Coupland C, Brindle P. Development and validation of QRISK3 risk prediction  
48 algorithms to estimate future risk of cardiovascular disease: prospective cohort study. *BMJ*.  
49 2017;357:j2099. doi:10.1136/bmj.j2099  
50  
51  
52  
53  
54  
55  
56  
57  
58  
59  
60

- 1  
2  
3 47. Pearson. *Advanced Clinical Solutions for WAIS-IV and WMS-IV*. The Psychological  
4 Corporation; 2009.  
5  
6 48. Delis D, Kaplan E, Kramer J. *Delis-Kaplan executive function system*. The Psychological  
7 Corporation; 2001.  
8  
9 49. Reitan RM. Validity of the Trail Making Test as an Indicator of Organic Brain Damage.  
10 *Perceptual and Motor Skills*. 1958;8(3):271-276. doi:10.2466/pms.1958.8.3.271  
11  
12  
13  
14  
15  
16  
17  
18  
19  
20  
21  
22  
23  
24  
25  
26  
27  
28  
29  
30  
31  
32  
33  
34  
35  
36  
37  
38  
39  
40  
41  
42  
43  
44  
45  
46  
47  
48  
49  
50  
51  
52  
53  
54  
55  
56  
57  
58  
59  
60

For peer review only

**Author contributions**

The first draft of the protocol was prepared by NSNG, GB, KZ, and DJS. All authors were involved in intellectually contributing to, refining and approving the final version of this manuscript.

**Funding statement:**

ADVANCE-TBI is funded by the ADVANCE Charity. Key contributors include Headley Court Charity (principal funder), HM Treasury (LIBOR Grant), Help for Heroes, Nuffield Trust for the Forces of the Crown, Forces in Mind Trust, National Lottery Community Fund, Blesma—The Limbless Veterans and the UK Ministry of Defence.

**License statement:**

The Submitting Author accepts and understands that any supply made under these terms is made by BMJ to the Submitting Author unless you are acting as an employee on behalf of your employer or a postgraduate student of an affiliated institution which is paying any applicable article publishing charge (“APC”) for Open Access articles. Where the Submitting Author wishes to make the Work available on an Open Access basis (and intends to pay the relevant APC), the terms of reuse of such Open Access shall be governed by a Creative Commons licence – details of these licences and which [Creative Commons](#) licence will apply to this Work are set out in our licence referred to above.

**Competing interests:**

HZ has served at scientific advisory boards and/or as a consultant for Abbvie, Alector, ALZPath, Annexon, Apellis, Artery Therapeutics, AZTherapies, CogRx, Denali, Eisai, Nervgen, Novo Nordisk, Pinteon Therapeutics, Red Abbey Labs, reMYND, Passage Bio, Roche, Samumed, Siemens Healthineers, Triplet Therapeutics, and Wave, has given lectures in symposia sponsored by Cellectricon, Fujirebio, Alzecure, Biogen, and Roche, and is a co-founder of Brain Biomarker Solutions in Gothenburg AB (BBS), which is a part of the GU Ventures Incubator Program (outside submitted work). DJS provides medicolegal services and serves on the Rugby Football Union concussion advisory board.

**Figure 1. Recruitment within the ADVANCE study.** Cumulative number of patients within the broader ADVANCE study showing date of baseline assessment and first follow-up visit, with patients recruited into ADVANCE-TBI in green.

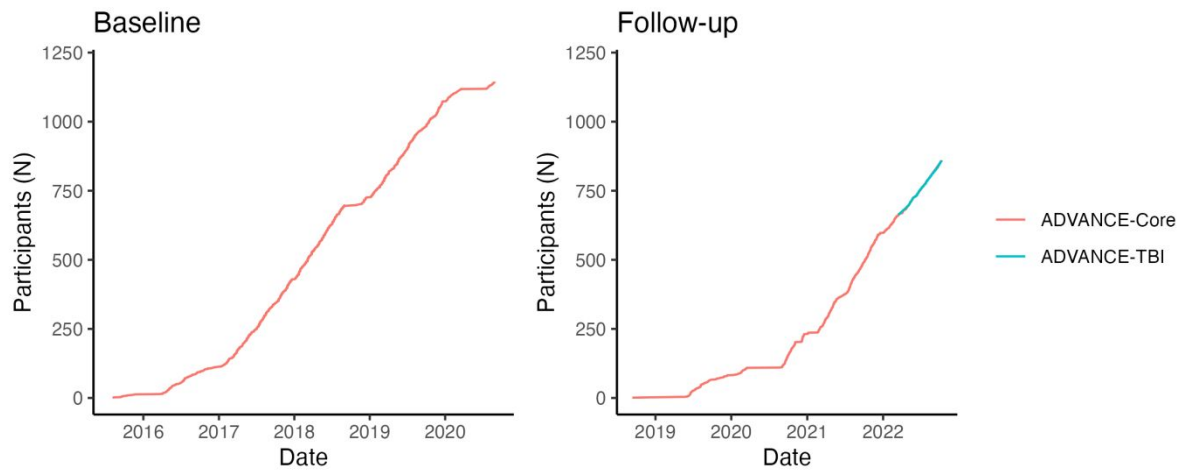

**Table 1. Assessment timepoints in ADVANCE core and ADVANCE-TBI studies** *Study assessment time points for core ADVANCE assessments and assessments within the ADVANCE-TBI study. 'x' denotes included, '-' denotes excluded.*

|                     |                     | Study visit (years post recruitment) |   |   |    |    |    |
|---------------------|---------------------|--------------------------------------|---|---|----|----|----|
|                     |                     | 0                                    | 3 | 6 | 10 | 15 | 20 |
| <b>Core ADVANCE</b> | Clinical assessment | x                                    | x | x | x  | x  | x  |
|                     | DNA                 | x                                    | - | - | -  | -  | -  |
|                     | Blood biomarkers    | x                                    | x | x | x  | x  | x  |
| <b>ADVANCE-TBI</b>  | MRI brain           | -                                    | x | x | x  | x  | x  |
|                     | Neuropsychology     | -                                    | X | X | X  | X  | X  |

**Table 2. TBI exposure ascertainment** *Characterisation of the index injury in relation to polytrauma, or uninjured participants in ADVANCE study, as well as additional exposure characterisation related to prior or subsequent events.*

| Index Injury categorisation            |                             |           |  |
|----------------------------------------|-----------------------------|-----------|--|
| Battlefield trauma exposed             |                             | Unexposed |  |
| TBI +/- extracranial injuries          | Extracranial injuries alone | No injury |  |
| Additional exposures                   |                             |           |  |
| Previous or subsequent TBIs (N)        |                             |           |  |
| Repeated head impacts (type, duration) |                             |           |  |

**Table 3. TBI severity assessment (Mayo Classification)** *Classification of TBI severity based on clinical, neuroimaging and symptomatic features. Table adapted from Malec et al.<sup>22</sup>*

|                                         | TBI Severity                 |                                             |                                 |
|-----------------------------------------|------------------------------|---------------------------------------------|---------------------------------|
|                                         | Moderate-severe (definite)   | Mild probable                               | Symptomatic possible            |
| <b>Clinical features include any of</b> |                              |                                             |                                 |
| Loss of consciousness                   | Present ≥ 30 minutes         | Momentary to 30 minutes                     | —                               |
| Post traumatic amnesia                  | Present ≥ 24 hours           | Momentary to 24 hours                       | —                               |
| Lowest Glasgow coma scale               | <13                          | —                                           | —                               |
| <b>Neuroimaging shows any of</b>        | Intracerebral haematoma      | Depressed, basilar or linear skull fracture | —                               |
|                                         | Subdural haematoma           | —                                           | —                               |
|                                         | Extradural haematoma         | —                                           | —                               |
|                                         | Contusion (haemorrhagic)     | —                                           | —                               |
|                                         | Penetrating injury (of dura) | —                                           | —                               |
|                                         | Subarachnoid haemorrhage     | —                                           | —                               |
|                                         | Brainstem injury             | —                                           | —                               |
| <b>Symptoms including any of</b>        | —                            | —                                           | Visual blurring                 |
|                                         | —                            | —                                           | Mental state change / confusion |
|                                         | —                            | —                                           | Dazed                           |
|                                         | —                            | —                                           | Dizziness                       |
|                                         | —                            | —                                           | Focal neurological symptoms     |
|                                         | —                            | —                                           | Headache                        |
|                                         | —                            | —                                           | Nausea                          |

**Table 4. MRI sequences on 3T Philips Ingenia ELITION scanner system**

| Sequence                                                                           | Voxel size (mm) | Function                                                                            |
|------------------------------------------------------------------------------------|-----------------|-------------------------------------------------------------------------------------|
| Volumetric T1 magnetization-prepared rapid acquisition with gradient echo (MPRAGE) | 1x1x1           | Assessment of atrophy                                                               |
| T2 fluid attenuated inversion recovery (FLAIR)                                     | 1x1x1           | Assessment for traumatic damage e.g. contusions / gliosis                           |
| Susceptibility weighted imaging (SWI)                                              | 0.6x0.6x1.2     | Sensitively assess for traumatic vascular injury ('microhaemorrhages')              |
| Quantitative susceptibility mapping (QSM)                                          | 0.9x0.9x0.9     | Assess for iron-related signal abnormality related to neurodegeneration             |
| Diffusion (receiver coil channels 32; directions 64; b value 1000)                 | 2x2x2           | Perform diffusion tensor imaging analysis of white matter microstructural integrity |
| Resting state functional MRI                                                       | 2.6x2.6x2.6     | Assess brain network function, connectivity and relationship to structural damage   |



**Table 5. ADVANCE-TBI Neuropsychological Testing**

| Neuropsychological test                                                          | Domain                                                                                             |
|----------------------------------------------------------------------------------|----------------------------------------------------------------------------------------------------|
| Test of Premorbid Functioning <sup>47</sup>                                      | Establish baseline IQ                                                                              |
| Delis-Kaplan Executive Function System<br>Stroop <sup>48</sup>                   | Executive function                                                                                 |
| Trail Making Test <sup>49</sup>                                                  | Executive function, processing speed                                                               |
| Repeatable Battery for the Assessment of Neuropsychological Status <sup>31</sup> | Range of domains including: immediate memory, delayed memory, visuospatial, language and attention |
| The Dot Counting test <sup>32</sup>                                              | Performance validity                                                                               |
| Simple reaction time, via tablet PC, Cognitron testing platform <sup>33</sup>    | Reaction time                                                                                      |
| Choice reaction time, via tablet PC, Cognitron testing platform <sup>33</sup>    | Processing speed                                                                                   |

**Table 6. Questionnaire Data**

| Questionnaire                                                 | Role                           |
|---------------------------------------------------------------|--------------------------------|
| The Ohio State Method <sup>24</sup>                           | Head injury exposure history   |
| Rivermead questionnaire <sup>26</sup>                         | Post-concussion symptoms       |
| Generalised anxiety disorder assessment (GAD 7) <sup>28</sup> | Anxiety symptoms               |
| Insomnia Severity Index (ISI) <sup>27</sup>                   | Sleep problems                 |
| PTSD checklist for DSM 5 (PCL 5) <sup>29</sup>                | Post-traumatic stress symptoms |
| EQ 5D 5L questionnaire <sup>30</sup>                          | Health-related quality of life |

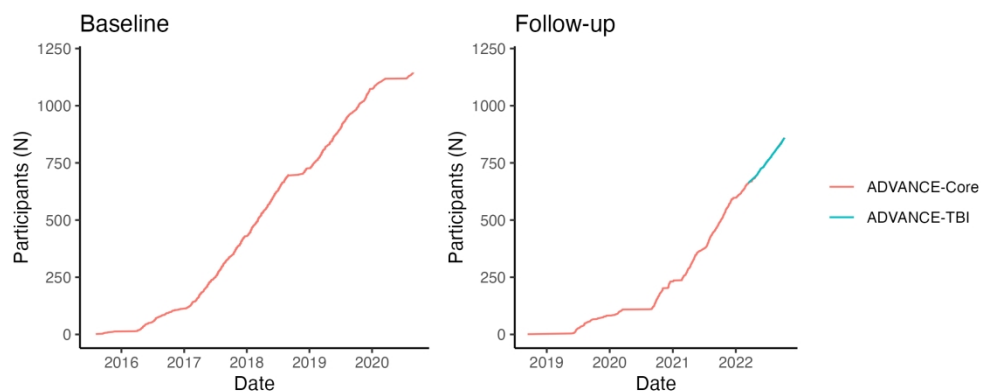

Recruitment within the ADVANCE study. Cumulative number of patients within the broader ADVANCE study showing date of baseline assessment and first follow-up visit, with patients recruited into ADVANCE-TBI in green.

508x203mm (118 x 118 DPI)

# BMJ Open

## The ADVANCE-TBI study protocol: a longitudinal cohort study of traumatic brain injury outcomes in UK military personnel serving in Afghanistan between 2003 and 2014

|                               |                                                                                                                                                                                                                                                                                                                                                                                                                                                                                                                                                                                                                                                                                                                                                                                                                                                                                                                                                                                                                                                                                                                                                                                                                                                                                                                                                                                                                                                                                                                                                                                                                                                                                                                                                                                                                                                                                                                                                                                                                                                                                                                                                                                                                                                                        |
|-------------------------------|------------------------------------------------------------------------------------------------------------------------------------------------------------------------------------------------------------------------------------------------------------------------------------------------------------------------------------------------------------------------------------------------------------------------------------------------------------------------------------------------------------------------------------------------------------------------------------------------------------------------------------------------------------------------------------------------------------------------------------------------------------------------------------------------------------------------------------------------------------------------------------------------------------------------------------------------------------------------------------------------------------------------------------------------------------------------------------------------------------------------------------------------------------------------------------------------------------------------------------------------------------------------------------------------------------------------------------------------------------------------------------------------------------------------------------------------------------------------------------------------------------------------------------------------------------------------------------------------------------------------------------------------------------------------------------------------------------------------------------------------------------------------------------------------------------------------------------------------------------------------------------------------------------------------------------------------------------------------------------------------------------------------------------------------------------------------------------------------------------------------------------------------------------------------------------------------------------------------------------------------------------------------|
| Journal:                      | <i>BMJ Open</i>                                                                                                                                                                                                                                                                                                                                                                                                                                                                                                                                                                                                                                                                                                                                                                                                                                                                                                                                                                                                                                                                                                                                                                                                                                                                                                                                                                                                                                                                                                                                                                                                                                                                                                                                                                                                                                                                                                                                                                                                                                                                                                                                                                                                                                                        |
| Manuscript ID                 | bmjopen-2022-069243.R1                                                                                                                                                                                                                                                                                                                                                                                                                                                                                                                                                                                                                                                                                                                                                                                                                                                                                                                                                                                                                                                                                                                                                                                                                                                                                                                                                                                                                                                                                                                                                                                                                                                                                                                                                                                                                                                                                                                                                                                                                                                                                                                                                                                                                                                 |
| Article Type:                 | Protocol                                                                                                                                                                                                                                                                                                                                                                                                                                                                                                                                                                                                                                                                                                                                                                                                                                                                                                                                                                                                                                                                                                                                                                                                                                                                                                                                                                                                                                                                                                                                                                                                                                                                                                                                                                                                                                                                                                                                                                                                                                                                                                                                                                                                                                                               |
| Date Submitted by the Author: | 20-Jan-2023                                                                                                                                                                                                                                                                                                                                                                                                                                                                                                                                                                                                                                                                                                                                                                                                                                                                                                                                                                                                                                                                                                                                                                                                                                                                                                                                                                                                                                                                                                                                                                                                                                                                                                                                                                                                                                                                                                                                                                                                                                                                                                                                                                                                                                                            |
| Complete List of Authors:     | <p>Graham, Neil; Imperial College London, Department of Brain Sciences; UK Dementia Research Institute Centre for Care Research and Technology, Imperial College London</p> <p>Blissitt, Grace; Imperial College London; Defence Medical Rehabilitation Centre, Academic Department of Military Rehabilitation</p> <p>Zimmerman, Karl; Imperial College London, Department of Brain Sciences; UK Dementia Research Institute Centre for Care Research and Technology, Imperial College London</p> <p>Friedland, Daniel; Imperial College London, Department of Brain Sciences</p> <p>Dumas, Marc- Emmanuel; Imperial College London National Heart and Lung Institute; Imperial College London Department of Metabolism Digestion and Reproduction</p> <p>Coady, Emma; Imperial College London National Heart and Lung Institute; Defence Medical Rehabilitation Centre, Academic Department of Military Rehabilitation</p> <p>Heslegrave, Amanda; UCL Queen Square Institute of Neurology; UK Dementia Research Institute, University College London</p> <p>Zetterberg, Henrik; UCL Queen Square Institute of Neurology; UK Dementia Research Institute, University College London</p> <p>Escott-Price, Valentina; Cardiff University, Division of Psychological Medicine and Clinical Neurosciences, School of Medicine; UK Dementia Research Institute, Cardiff University</p> <p>Schofield, Susie; Imperial College London National Heart and Lung Institute</p> <p>Fear, Nicola; King's College London, King's Centre for Military Health Research; King's College London, Academic Department for Military Mental Health</p> <p>Boos, Christopher; Imperial College London National Heart and Lung Institute; King's College London, Academic Department for Military Mental Health</p> <p>Bull, Anthony; Imperial College London, Centre for Injury Studies; Imperial College London, Department of Bioengineering</p> <p>Cullinan, Paul; Imperial College London National Heart and Lung Institute</p> <p>Bennett, Alexander; Academic Department of Military Rehabilitation, Defence Medical Rehabilitation Centre; Imperial College London National Heart and Lung Institute</p> <p>Sharp, David; Imperial College London, Department of Brain Sciences;</p> |

|                                  |                                                                                                                                                                                                                           |
|----------------------------------|---------------------------------------------------------------------------------------------------------------------------------------------------------------------------------------------------------------------------|
|                                  | UK Dementia Research Institute Centre for Care Research and Technology, Imperial College London<br>the ADVANCE Study, On behalf of; Defence Medical Rehabilitation Centre, Academic Department of Military Rehabilitation |
| <b>Primary Subject Heading</b> : | Neurology                                                                                                                                                                                                                 |
| Secondary Subject Heading:       | Mental health, Rehabilitation medicine, Radiology and imaging, Diagnostics                                                                                                                                                |
| Keywords:                        | Neurology < INTERNAL MEDICINE, Dementia < NEUROLOGY, TRAUMA MANAGEMENT, Magnetic resonance imaging < RADIOLOGY & IMAGING, Neurological injury < NEUROLOGY, Neurosurgery < SURGERY                                         |
|                                  |                                                                                                                                                                                                                           |

SCHOLARONE™  
Manuscripts

1  
2  
3 1 **The ADVANCE-TBI study protocol: a longitudinal cohort study of traumatic brain injury outcomes**  
4  
5 2 **in UK military personnel serving in Afghanistan between 2003 and 2014**  
6  
7 3

8  
9 4 **Authors**

10 5 Neil SN Graham<sup>1,2</sup>, Grace Blissitt<sup>3,4</sup>, Karl A Zimmerman<sup>1,2</sup>, Daniel Friedland<sup>1</sup>, Marc-Emmanuel  
11 6 Dumas<sup>3,5,6,7</sup>, Emma Coady<sup>3,4</sup>, Amanda Heslegrave<sup>8,9</sup>, Henrik Zetterberg<sup>8,9,10,11,12</sup>, Valentina  
12 7 Escott-Price<sup>13,14</sup>, Susie Schofield<sup>3</sup>, Nicola T Fear<sup>15,16</sup>, Christopher J Boos<sup>4,16,17,18</sup>, Anthony M J  
13 8 Bull<sup>19,20</sup>, Paul Cullinan<sup>3</sup>, Alexander Bennett<sup>4,3</sup> and David J Sharp<sup>1,2,19</sup> for the ADVANCE Study  
14  
15  
16  
17  
18 9

19 10 **Affiliations:**

- 20 11 1. Department of Brain Sciences, Imperial College London, UK  
21 12 2. UK Dementia Research Institute Centre for Care Research and Technology, Imperial College London  
22 13 3. National Heart and Lung Institute, Imperial College London, London, UK  
23 14 4. Academic Department of Military Rehabilitation, Defence Medical Rehabilitation Centre, Stanford Hall, Loughborough, UK  
24 15 5. Department of Metabolism, Digestion and Reproduction, Imperial College London, London, UK  
25 16 6. European Genomics Institute for Diabetes, U1283 INSERM / UMR 8199 CNRS, Institut Pasteur de Lille, Lille University Hospital, University  
26 17 of Lille, Lille, France  
27 18 7. McGill Genome Centre, McGill University, Montréal, Qc, Canada  
28 19 8. Department of Neurodegenerative Disease, UCL Institute of Neurology, Queen Square, London, UK  
29 20 9. UK Dementia Research Institute at UCL, London, UK  
30 21 10. Department of Psychiatry and Neurochemistry, Institute of Neuroscience and Physiology, the Sahlgrenska Academy at the University of  
31 22 Gothenburg, Mölndal, Sweden  
32 23 11. Clinical Neurochemistry Laboratory, Sahlgrenska University Hospital, Mölndal, Sweden  
33 24 12. Hong Kong Center for Neurodegenerative Diseases, Clear Water Bay, Hong Kong, China  
34 25 13. Division of Psychological Medicine and Clinical Neurosciences, School of Medicine, Cardiff University, UK  
35 26 14. UK Dementia Research Institute at Cardiff University, UK  
36 27 15. King's Centre for Military Health Research, King's College London, London, UK  
37 28 16. Academic Department for Military Mental Health, King's College London, London, UK  
38 29 17. Faculty of Health & Social Sciences, Bournemouth University, Bournemouth, UK  
39 30 18. Department of Cardiology, University Hospitals Dorset NHS Foundation Trust, Poole Hospital, Poole, UK  
40 31 19. Centre for Injury Studies, Imperial College London, London, UK  
41 32 20. Department of Bioengineering, Imperial College London, London, UK  
42  
43  
44  
45  
46  
47  
48  
49  
50  
51  
52  
53  
54  
55  
56  
57  
58  
59  
60

34 **Corresponding author: David J Sharp**

35 Department of Brain Sciences, Imperial College London, UK  
36 UK Dementia Research Institute Centre for Care Research and Technology, Imperial College London  
37 Centre for Injury Studies, Imperial College London, London, UK  
38 david.sharp@imperial.ac.uk  
39  
40  
41

## 1 **Abstract**

2 Introduction: Outcomes of traumatic brain injury (TBI) are highly variable, with cognitive and  
3 psychiatric problems often present in survivors, including an increased dementia risk in the  
4 long-term. Military personnel are at an increased occupational risk of TBI, with high rates of  
5 complex polytrauma including injuries characterising the UK campaign in Afghanistan. The  
6 ADVANCE-TBI sub-study will describe the patterns, associations and long-term outcomes of  
7 TBI in the established ArmeD SerVices TrAuma and RehabilitatioN OutComE (ADVANCE)  
8 cohort.

9 Methods and Analysis: The ADVANCE cohort comprises 579 military personnel exposed to  
10 major battlefield trauma requiring medical evacuation, and 566 matched military personnel  
11 without major trauma. TBI exposure has been captured at baseline using a standardised  
12 interview and registry data, and will be refined at first follow-up visit with the Ohio State  
13 method TBI interview (a NINDS TBI common data element). Participants will undergo blood  
14 sampling, MRI and detailed neuropsychological assessment longitudinally as part of their  
15 follow-up visits every three to five years over a twenty year period. Biomarkers of injury,  
16 neuroinflammation and degeneration will be quantified in blood, and polygenic risk scores  
17 calculated for neurodegeneration. Age-matched healthy volunteers will be recruited as  
18 controls for MRI analyses. We will describe TBI exposure across the cohort, consider any  
19 relationship with advanced biomarkers of injury and clinical outcomes including cognitive  
20 performance, neuro-psychiatric symptom burden and function. The influence of genotype  
21 will be assessed. This research will explore the relationship between military head injury  
22 exposure and long-term outcomes, providing insights into underlying disease mechanisms  
23 and informing prevention interventions.

24 Ethics and Dissemination: The ADVANCE TBI sub-study has received a favourable opinion the  
25 Ministry of Defence Research Ethics Committee (REF 2126/MODREC/22). Findings will be  
26 disseminated via publications in peer-reviewed journals and presentations at conferences.

## Strengths and limitations of the study

- ADVANCE-TBI integrates with and extends the existing ADVANCE cohort study of 1145 military personnel with detailed longitudinal clinical, physiological, biomarker, genetic and functional assessment.
- This sub-study is well powered to interrogate the relationship between TBI exposure, and long-term clinical outcomes with advanced biomarkers clarifying underlying disease mechanisms.
- Results will inform public health prevention strategies in military, sporting and civilian settings, by identifying which types of injury pose the highest risks of progressive problems, and who might be at highest risk.
- One limitation is that the ADVANCE cohort does not include female personnel, which may influence the generalisability of our findings
- A degree of loss-to-follow-up is anticipated but this is mitigated by the very large sample size

## 1 Introduction

2 Traumatic brain injury (TBI) is a significant cause of morbidity and mortality;<sup>1</sup> road traffic  
3 accidents, a surrogate for TBI, are the foremost cause of disability in people aged 10-49 years  
4 worldwide.<sup>2</sup> In the military setting, complex patterns of injury are produced by battlefield  
5 head injury with high rates of blast neurotrauma in recent UK campaigns in Afghanistan and  
6 Iraq.<sup>3</sup> Estimates of TBI rates vary depending on definition and ascertainment approaches, but  
7 are thought to affect a range of 5 to 30% of service personnel.<sup>4-7</sup> Management of battlefield  
8 trauma has improved, such that patients are now surviving injuries but living with greater  
9 levels of disability.<sup>8</sup>

10 A range of neurological and psychiatric problems, including cognitive difficulties, may arise  
11 after TBI. These 'direct effects' of injury recover to a variable extent. There is also evidence  
12 that a proportion of patients will deteriorate late after trauma,<sup>9</sup> with an increased risk of all-  
13 subtype dementia associated with TBI.<sup>10</sup> Epidemiological data suggest a dose-response  
14 relationship, with greatest risk associated with more severe injuries, or repeated TBI.<sup>9-11</sup>  
15 There has been particular concern about chronic traumatic encephalopathy (CTE) in military  
16 veterans. This trauma-associated tauopathy is considered a progressive neurodegenerative  
17 disease and has been described in a number of combat veterans including after blast.<sup>12,13</sup> The  
18 relationship between the types, severity, quantity of head injuries and long-term brain health  
19 outcomes remains very uncertain.

20 Advances in neuroimaging and fluid biomarker technologies provide improved means to  
21 sensitively assess patients for the presence of TBI possible effects such as neurodegenerative  
22 disease, including in pre-symptomatic periods.<sup>14</sup> For example, diffusion tensor imaging MRI  
23 (DTI) is highly sensitive to white matter damage sustained during TBI, and may reveal changes  
24 which are not present on conventional imaging such as CT or standard MRI sequences.<sup>15</sup> Given  
25 the dynamic changes after TBI, longitudinal imaging (eg. with DTI) may be particularly  
26 informative.<sup>16,17</sup> In addition, single molecule array (Simoa) technology (a bead-based,  
27 digitalized version of enzyme-linked sandwich immunoassay) can quantify neuronal  
28 breakdown products in blood to sub-femtomolar ( $10^{-15}$ ) concentrations, with axonal marker  
29 neurofilament light (NfL) highly sensitive to axonal damage and progressive degeneration  
30 which can take place chronically after TBI.<sup>18</sup> Elevations in both NfL and astroglial activation



1 marker GFAP have been reported as long as five years after moderate-severe TBI<sup>19</sup>. Acutely,  
2 GFAP peaks within days of injury whereas NfL plasma concentrations are maximal around 3  
3 weeks post-TBI, making these optimal timepoints to take clinical samples early post-injury:  
4 both markers predict 1 year outcomes, with NfL numerically (but non-significantly) the better  
5 predictor.<sup>18</sup> However, longer term trajectories remain more imprecisely defined. For example,  
6 the BIO-AX-TBI cohort showed raised NfL and GFAP at one year post-injury,<sup>18,20</sup> with others  
7 finding raised NfL (only, not GFAP) at 8 months post-injury without longer term (>5 years)  
8 elevation in either marker.<sup>21</sup> New approaches may also provide an improved understanding  
9 of the genetic factors influencing outcomes long after trauma. For instance, the  
10 apolipoprotein E  $\epsilon$ 4 allele is a major genetic risk factor for late onset Alzheimer's disease and  
11 is linked to poor clinical outcomes after TBI.<sup>22,23</sup> Polygenic risk scores (PRS) are able to include  
12 genetic risk loci such as *APOE*, and further incorporate a large range of risk polymorphisms  
13 identified in genome wide association studies (GWAS), to explain more phenotypic variance  
14 than traditional approaches.<sup>24 25</sup>

15 The prospective ADVANCE study of combat trauma outcomes was established to investigate  
16 the long-term health consequences of battlefield trauma in the UK Afghanistan campaign,  
17 'Operation Herrick', between 2002 and 2014. The study protocol is available for a more  
18 detailed description.<sup>26</sup> Briefly, in total 1145 military personnel, around half of whom were  
19 exposed to major battlefield trauma alongside frequency matched controls, have been  
20 recruited to ADVANCE and undergone detailed baseline evaluation. This comprised  
21 comprehensive biological, psychological and social data ascertainment including the presence  
22 of head injury at time of trauma. The consortium has previously reported on cardiovascular  
23 changes related to battlefield trauma, with higher rates of metabolic syndrome associated  
24 with injury,<sup>27</sup> and adverse effects of combat trauma on mental health.<sup>28</sup>

25 ADVANCE-TBI, a sub-study of ADVANCE, takes advantage of the unique opportunity to  
26 leverage recent scientific advances to clarify in detail the patterns of TBI arising from the  
27 Afghanistan campaign. It will describe the neurological and psychiatric outcomes of these  
28 patients over time, and relating these to head injury exposures. This will provide key insights  
29 into disease mechanisms, facilitate the establishment of clinical trials to prevent progressive  
30 post-injury problems, improve prognostication and inform strategies to prevent significant  
31 injury.

## 1 **Research Questions**

- 2 (1) What is the prevalence of TBI in the ADVANCE cohort?
- 3 (2) How does combat TBI relate to evidence of progressive neurodegeneration and brain  
4 health? (see hypotheses 1,2,3,4,5)
- 5 (3) How do prior or subsequent TBI exposures, or periods of repeated head impact  
6 exposure influence long-term health? (see hypotheses 3,4)
- 7 (4) Do genetic risk factors for neurodegeneration modulate relationships between injury  
8 and outcome? (see hypothesis 6)
- 9 (5) How do genetic factors, and different environmental exposures (e.g. cardiovascular  
10 health) influence post-traumatic neurodegeneration? (see hypotheses 6,7)

## 11 **Core Hypotheses**

- 12 (1) Compared to those with no history of TBI, patients after TBI will show MRI evidence  
13 of white matter damage, specifically reductions in diffusion imaging measures,  
14 including fractional anisotropy; and that this will predict poor long-term outcomes  
15 including progressive neurodegeneration
- 16 (2) Compared to those with no history of TBI, patients after TBI will show evidence of  
17 brain atrophy, demonstrated by reduced brain volume on volumetric structural T1  
18 MRI and increased brain atrophy rates on serial volumetric T1 MRI
- 19 (3) Compared to those with no history of TBI, patients after TBI will show poorer cognitive  
20 performance on standardised neuropsychological testing
- 21 (4) Compared to those with no history of TBI, patients after TBI will show higher symptom  
22 burden in respect of mood, anxiety and post-traumatic stress
- 23 (5) Compared to those with no history of TBI, patients after TBI will show increased  
24 concentrations of plasma biomarkers of trauma in blood, including neurofilament light  
25 (NfL) and glial fibrillary acidic protein (GFAP); and these biomarkers will predict  
26 progressive neurodegeneration
- 27 (6) In patients with history of TBI, genetic risk for neurodegeneration will modulate the  
28 relationship between injury and biomarkers of neurodegeneration
- 29 (7) Additional (prior or subsequent) TBI exposures will modify the relationship between  
30 index injury and neurodegeneration

## 1 **Methods and Analysis**

2 We will investigate the long-term neurological, psychiatric and functional outcomes of UK  
3 armed services physical battlefield trauma patients with a history of TBI. We will describe the  
4 types, severity, and morbidity of TBI sustained by military personnel serving in Afghanistan.  
5 Additionally, we will describe patterns of brain damage using advanced MRI and relate this to  
6 the type of injury sustained (e.g. blast / gunshot / blunt force). We will investigate how the  
7 type of injury, patterns of TBI in neuroimaging and blood biomarker profiles relate to cognitive  
8 performance and assess whether post-traumatic outcomes are influenced by genetic liability  
9 to neurodegenerative disease.

## 11 **Participants and Sample Size**

12 ADVANCE-TBI is a prospective longitudinal sub-study of the existing ADVANCE cohort. All  
13 ADVANCE participants will be offered the opportunity to enrol into ADVANCE-TBI, which, in  
14 brief, adds a 3T MRI scan of brain and cognitive assessment to the usual follow-up visits (see  
15 Table 1). Initially this will be on two consecutive follow-up visits 3-5 years apart, which will be  
16 extended subject to funding. A small group (n=30) of volunteers with no history of frontline  
17 military service or brain injury will also be recruited to have a single MRI scan of brain.

19 **Table 1. Study design and planned study assessment timepoints in ADVANCE core and  
20 ADVANCE-TBI sub-study . All ADVANCE core assessments are performed for all participants,  
21 with ADVANCE-TBI substudy facilitating additional MRI brain, neuropsychology and blood  
22 biomarker analyses. 'x' denotes included, '-' denotes excluded.**

|                                  |                     | Planned study visit (years post recruitment) |   |   |    |    |    |
|----------------------------------|---------------------|----------------------------------------------|---|---|----|----|----|
|                                  |                     | 0                                            | 3 | 6 | 10 | 15 | 20 |
| <b>ADVANCE</b>                   | Clinical assessment | x                                            | x | x | x  | x  | x  |
|                                  | DNA                 | x                                            | - | - | -  | -  | -  |
| <b>ADVANCE-TBI<br/>sub-study</b> | MRI brain           | -                                            | x | x | x  | x  | x  |
|                                  | Neuropsychology     | -                                            | x | x | x  | x  | x  |
|                                  | Blood biomarkers    | x                                            | x | x | x  | x  | x  |

1  
2  
3 1 The sample size of the ADVANCE cohort has already been established,<sup>26</sup> and as per a number  
4 of existing assessments which form part of the core ADVANCE study (e.g. universal DEXA  
5 scanning, hip/knee/pelvic x-rays), we intend to offer ADVANCE-TBI to all participants.<sup>26</sup> The  
6 primary outcomes are (1) ascertainment of exposure to head injury across the ADVANCE  
7 cohort and (2) diffusion tensor imaging MRI difference in white matter integrity between  
8 patients with, and without history of TBI. The first outcome is descriptive rather than  
9 hypothesis driven.

10 We anticipate uptake in the region of 80% resulting in a group of around 900 participants. A  
11 conservative estimate of TBI rates within the cohort from previous literature of 7.5%.<sup>4,5</sup> This  
12 equates to around 68 individuals with TBI: however the number is likely to be higher as  
13 ADVANCE specifically enrolled patients with major trauma exposure (in ~50%). We will be  
14 able to provide a detailed description of the types, quantity and severity of injury across the  
15 cohort. As described in the core ADVANCE protocol, we anticipate a drop-out rate of 10%  
16 every 5 years; hence a group size (conservatively) of 590 participants at 20 years.

17 Detection of significant trauma-related abnormalities on diffusion tensor MRI: our previous  
18 work has shown a very substantial difference in white matter fractional anisotropy on DTI MRI  
19 in the chronic phase after moderate-severe TBI versus healthy age-matched controls (Cohen's  
20  $d=2.2$ ).<sup>29</sup> Power calculations (G\*Power, version 3.1) show that to have 95% power using a  
21 two-tailed t test to detect an effect of this magnitude, with an alpha error probability of 5%,  
22 a minimum of seven patients per study arm would be needed. Assuming an 80% enrolment  
23 of the cohort,  $n=900$  people, half of whom i.e. 450 have combat trauma exposure, we expect  
24 circa 10% to have TBI ( $n=45$ ). We are therefore well powered to detect differences in white  
25 matter integrity between patients with combat trauma including, and excluding TBI (given a  
26 requirement of 7 patients).

## 27 **Entry into the study**

28 Recruitment of the ADVANCE cohort began in March 2016. Defence Statistics provided  
29 information from which both groups were recruited. All ADVANCE cohort participants will be  
30 offered the opportunity to take part in the ADVANCE-TBI study. Assenting participants will be

1 formally assessed for eligibility and invited to provide informed, written consent. The right of  
2 the participant to refuse consent without giving reasons will be respected. Further, the  
3 participant will remain free to withdraw from the study and withdraw previously collected  
4 data, at any time without giving reasons and without prejudicing any further treatment. A  
5 copy of the consent will be given to the participant, and one filed in the Trial Master File, and  
6 within their MoD medical records (if still serving). The written consent will be taken by an  
7 authorised clinician. We will only recruit participants who have mental capacity to provide  
8 valid informed consent. Standard procedures will be followed in the event that a participant  
9 loses capacity during the course of the study, per Health Research Authority / Ministry of  
10 Defence Research Ethics Committee regulations.

11 Inclusion / Exclusions: Core ADVANCE inclusion criteria are described in detail elsewhere.<sup>26</sup>  
12 Briefly, they comprise UK Armed services personnel; male; sustaining physical battlefield  
13 trauma, while on deployment in Afghanistan, requiring aeromedical evacuation and direct UK  
14 hospital admission from 2003 to 2014. This comprises an 'exposed group', exposed to major  
15 battlefield trauma, though not necessarily TBI. A frequency matched 'unexposed group' was  
16 also recruited in ADVANCE, without major battlefield trauma requiring aeromedical  
17 evacuation. The following are excluded from ADVANCE: females; those unwilling or unable to  
18 give informed consent; those with established CVD (previous stroke or transient ischaemic  
19 attack, ischaemic heart disease, peripheral vascular disease); past medical history of diabetes;  
20 past medical history of renal or liver disease; Aged <18 or >50 years at recruitment; active  
21 acute infection with systemic features of sepsis, at the time of recruitment. Participants are  
22 also excluded from the MRI part of ADVANCE-TBI if there is a contraindication to this imaging  
23 modality, e.g. due to ferromagnetic implants. We anticipate this will comprise only a very  
24 small number of individuals.

25 Assessment timeline and content: TBI-specific assessments will be integrated into the existing  
26 schedule of longitudinal follow-ups in the ADVANCE study. Specifically, this comprises  
27 assessments at baseline (complete in 1145 participants), ongoing assessments at 3 years  
28 (complete in circa 850 participants), as well as 7, 10, 15 and 20 years after recruitment into  
29 ADVANCE. The TBI assessments, in consenting participants, start at their next scheduled

1  
2  
3 1 ADVANCE study visit. Recruitment into the ADVANCE-TBI sub-study started in May 2022, with  
4 2 approximately 150 participants enrolled in so far (Figure 1).  
5  
6  
7

### 8 3 *Healthy volunteer assessment*

9  
10 4 We will recruit thirty age-matched non-ADVANCE healthy volunteers with no history of  
11 5 frontline military service for a single brain MRI scan (3T MRI on Philips Ingenia Elition, scan  
12 6 protocol identical to the other study participants). This is to assist interpretation and broader  
13 7 comparison of the imaging measures acquired in ADVANCE participants. This will be done  
14 8 cross-sectionally. Age matching will be performed to ensure equal proportions in 10 year age  
15 9 bands, compared with patients. These participants will be recruited via email circulation,  
16 10 word of mouth, and advertisement material in the form of posters. Healthy volunteer  
17 11 participants may include civilian contractors and MOD health professionals who have not  
18 12 been exposed to combat environments.  
19  
20  
21  
22  
23  
24  
25  
26  
27

28 13 Inclusions for non-ADVANCE healthy volunteers: age range as per the ADVANCE cohort.  
29 14 Exclusion criteria are: females, unable to have MRI e.g., due to ferromagnetic implants, those  
30 15 with established vascular disease (previous stroke or transient ischaemic attack, ischaemic  
31 16 heart disease, peripheral vascular disease); past medical history of diabetes; past medical  
32 17 history of renal or liver disease, history of major head injury, defined as any head injury  
33 18 requiring ED attendance or any injury defined as moderate-severe in Mayo classification <sup>30</sup>,  
34 19 history of playing collision sports (Association or American Football, rugby, lacrosse, boxing,  
35 20 mixed martial arts) at a semi-professional or professional level, including high-level university  
36 21 sport participation, head injury in last 3 months or a history of frontline military service.  
37  
38  
39  
40  
41  
42  
43  
44  
45  
46  
47  
48  
49

### 50 23 **Identification of injuries, severity ascertainment, periods of repeated head impact exposure**

51 24 We will use standardised tools to capture and code the numbers, type, severity and sequelae  
52 25 of head injuries within the cohort. NINDS common data elements for traumatic brain injury  
53 26 research will be used where possible to code this information,<sup>31</sup> facilitating standardised  
54 27 comparisons and later sharing of data.  
55  
56  
57  
58  
59  
60

1  
2  
3 1 A standardised interview was used at the baseline study visit to capture the participant's  
4  
5 2 medical history including of TBI, recorded on the past medical history page of the ADVANCE  
6  
7 3 study case report form. Supplementing this the UK Aeromedical Evacuation and Joint Theatre  
8  
9 4 Trauma Registry (JTTR) provides further detailed information about the acute injury and its  
10  
11 5 early management. Lastly, review of the military medical records will be used to help  
12  
13 6 complete any missing data regarding the TBI exposure and its early management. These are  
14  
15 7 sources to which the ADVANCE study already has ethical approval to use and access in place.

16  
17 8 The Ohio State TBI Identification Method <sup>32</sup> is being used at the first follow-up visit in  
18  
19 9 ADVANCE, providing self-reported retrospective assessment of TBI exposure. This validated  
20  
21 10 tool provides information about significant injuries (or 'concussions') during each person's life  
22  
23 11 course, as well as capturing periods of time when that individual had frequent exposure to  
24  
25 12 head injuries (such as for example, participation for several years as a boxer). Any information  
26  
27 13 captured within the Ohio State questionnaire pertaining to the index injury will be  
28  
29 14 incorporated as above.

30  
31 15 We will characterise the trauma exposure by which the patient was defined as 'trauma  
32  
33 16 exposed' for the purpose of the advance study (i.e. event requiring aeromedical evacuation  
34  
35 17 from Afghanistan). For clarity, we term this the 'index' injury, in recognition that individuals  
36  
37 18 may have had prior, or subsequent to that which helped to define them as exposed for the  
38  
39 19 purpose of the ADVANCE study. We will identify groups of participants based on the presence  
40  
41 20 of TBI, associated polytrauma, or no trauma at the index event (Table 2).

42 21  
43  
44 22  
45  
46 23  
47  
48  
49  
50  
51  
52  
53  
54  
55  
56  
57  
58  
59  
60

**Table 2. TBI exposure ascertainment** *Characterisation of life course exposure to TBI. The participant may, for the purposes of the ADVANCE cohort study, be defined as 'exposed' (ie having a major combat traumatic injury requiring medical evacuation) or 'unexposed' (left column). This is referred to as the 'index' injury. This may or may not include TBI. Separate from this we will ascertain other injuries ('additional exposures', right column) with TBI.*

| Life-course TBI exposure                                                                                                               |     |                |                      |                                                                           |
|----------------------------------------------------------------------------------------------------------------------------------------|-----|----------------|----------------------|---------------------------------------------------------------------------|
| Index Injury                                                                                                                           |     |                | Additional exposures |                                                                           |
| (ie. exposed vs unexposed within the ADVANCE study; defined as requiring medical evacuation for trauma, vs non-trauma exposed control) |     |                |                      |                                                                           |
| Battlefield trauma exposed                                                                                                             |     |                | Unexposed            |                                                                           |
| TBI                                                                                                                                    | +/- | Extracranial   | No                   | 'index'                                                                   |
| extracranial                                                                                                                           |     | injuries alone | injury               |                                                                           |
| injuries                                                                                                                               |     |                |                      | Previous or subsequent TBIs (N)<br>Repeated head impacts (type, duration) |

We will use the Mayo classification to define injury severity and stratify the TBI group.<sup>30</sup> This classification approach categorises injury severity and provides a level of confidence about the categorisation, with three broad groups: symptomatic possible, mild probable, and moderate-severe (definite). Different categories of information are incorporated to determine a categorisation, and not all data types are required in any individual case. These include clinical features such as duration of post traumatic amnesia, imaging findings such as the presence of intraparenchymal haematoma, and or symptoms such as dizziness (Table 3).



**Table 3. TBI severity assessment (Mayo Classification)** *Classification of TBI severity based on clinical, neuroimaging and symptomatic features. Table adapted from Malec et al.<sup>30</sup>*

|                                         | TBI Severity                 |                                             |                                 |
|-----------------------------------------|------------------------------|---------------------------------------------|---------------------------------|
|                                         | Moderate-severe (definite)   | Mild probable                               | Symptomatic possible            |
| <b>Clinical features include any of</b> |                              |                                             |                                 |
| Loss of consciousness                   | Present ≥ 30 minutes         | Momentary to 30 minutes                     | —                               |
| Post traumatic amnesia                  | Present ≥ 24 hours           | Momentary to 24 hours                       | —                               |
| Lowest Glasgow coma scale               | <13                          | —                                           | —                               |
| <b>Neuroimaging shows any of</b>        |                              | Depressed, basilar or linear skull fracture | —                               |
|                                         | Intracerebral haematoma      | —                                           | —                               |
|                                         | Subdural haematoma           | —                                           | —                               |
|                                         | Extradural haematoma         | —                                           | —                               |
|                                         | Contusion (haemorrhagic)     | —                                           | —                               |
|                                         | Penetrating injury (of dura) | —                                           | —                               |
|                                         | Subarachnoid haemorrhage     | —                                           | —                               |
|                                         | Brainstem injury             | —                                           | —                               |
| <b>Symptoms including any of</b>        | —                            | —                                           | Visual blurring                 |
|                                         | —                            | —                                           | Mental state change / confusion |
|                                         | —                            | —                                           | Dazed                           |
|                                         | —                            | —                                           | Dizziness                       |
|                                         | —                            | —                                           | Focal neurological symptoms     |
|                                         | —                            | —                                           | Headache                        |
|                                         | —                            | —                                           | Nausea                          |

We will also identify non-index injury exposures to TBI and classify these using the Mayo classification, providing a count of moderate-severe and mild probable injuries. Periods of exposure to repeated head impacts, such as in sporting settings will also be assessed and quantified using the Ohio State method. This will define periods of exposure to repeated head impacts, capturing type (for instance, type of sport), and duration of exposure.

*Associations of trauma-related imaging change*

Given the possibility that traumatic injuries may not have been recognised clinically, such as in the context of marked polytrauma with severe injuries elsewhere to the body, we will define a group of participants with trauma-related change on MRI scanning and compare these individuals to those without trauma-related abnormalities on imaging. Features used

1  
2  
3 1 to define this group may include diffuse vascular injury on susceptibility weighted imaging  
4  
5 2 MRI (i.e. microhaemorrhages); evidence of diffuse axonal injury on diffusion tensor imaging,  
6  
7 3 focal trauma related damage on structural imaging.  
8  
9

10 4 We will assess for differences including in demographics, occupational exposure, and  
11  
12 5 recorded trauma exposures between these groups. Although we will not be able to accurately  
13  
14 6 date the changes on imaging to the index injury versus other events, this will provide an  
15  
16 7 indication of rates of un-recognised radiologically significant TBI within the cohort.  
17  
18  
19  
20

## 21 9 **Assessments during study visits**

### 22 23 24 10 *Magnetic resonance imaging (MRI)*

25  
26 11 Brain structure and function will be assessed using MRI (Phillips 3T Ingenia Elition). Volumetric  
27  
28 12 T1 will provide brain morphometric data and indicate the presence of any  
29  
30 13 neurodegeneration-associated brain atrophy; fluid attenuated inversion recovery (FLAIR)  
31  
32 14 sequences are acquired to assess specifically for post-traumatic change, including gliosis;  
33  
34 15 diffusion weighted imaging will be acquired to facilitate diffusion tensor imaging (DTI)  
35  
36 16 assessment of white matter tract integrity; susceptibility weighted imaging (SWI) to assess  
37  
38 17 evidence of diffuse vascular injury sustained at the time of trauma; and resting state  
39  
40 18 functional MRI to assess the effect of injury on brain network function. The scan duration is  
41  
42 19 approximately 1 hour (Table 4).  
43  
44  
45  
46  
47  
48  
49  
50  
51  
52  
53  
54  
55  
56  
57  
58  
59  
60

1 **Table 4. MRI sequences on 3T Philips Ingenia ELITION scanner system**

| Sequence                                                                           | Voxel size (mm) | Function                                                                            |
|------------------------------------------------------------------------------------|-----------------|-------------------------------------------------------------------------------------|
| Volumetric T1 magnetization-prepared rapid acquisition with gradient echo (MPRAGE) | 1x1x1           | Assessment of atrophy                                                               |
| T2 fluid attenuated inversion recovery (FLAIR)                                     | 1x1x1           | Assessment for traumatic damage e.g. contusions / gliosis                           |
| Susceptibility weighted imaging (SWI)                                              | 0.6x0.6x1.2     | Sensitively assess for traumatic vascular injury ('microhaemorrhages')              |
| Quantitative susceptibility mapping (QSM)                                          | 0.9x0.9x0.9     | Assess for iron-related signal abnormality related to neurodegeneration             |
| Diffusion (receiver coil channels 32; directions 64; b value 1000)                 | 2x2x2           | Perform diffusion tensor imaging analysis of white matter microstructural integrity |
| Resting state functional MRI                                                       | 2.6x2.6x2.6     | Assess brain network function, connectivity and relationship to structural damage   |

2  
3 Scanning will be performed on one occasion for healthy volunteers, and longitudinally for  
4 ADVANCE participants, within the existing longitudinal study visit schedule. We anticipate  
5 that all scanning will take place within the radiology department at DMRC Stanford Hall. All  
6 images will be reported by a consultant neuroradiologist and the imaging reports reviewed  
7 by the ADVANCE-TBI study doctors.

8 An MRI phantom will be imaged repeatedly during the study period to ensure no un-  
9 recognised change in the acquisitions which might affect longitudinal data collection. We aim  
10 to acquire data on the same scanner system with the same parameters longitudinally: if this  
11 should not be possible, we will systematically assess for differences, and re-image healthy  
12 controls if required, and normalise imaging data (eg. via z-scoring approach vs. controls) to  
13 facilitate comparisons across scanner configurations/systems.

1 MRI assessment at single timepoint in healthy controls will facilitate normalisation of  
 2 diffusion MRI results and hence comparison with other studies. The within-subject  
 3 longitudinal nature of the other analyses does not necessitate follow-up imaging in healthy  
 4 volunteers.

5  
 6 *Neuropsychology, including symptoms associated with TBI, including post-traumatic stress*  
 7 *symptoms, sleep quality, anxiety symptoms, depressive symptoms, and quality of life*

8 Prior to testing patients will be asked duration of education, native language, whether they  
 9 had any reading, writing, or spelling difficulties at school, or whether they have colour  
 10 blindness. The assessments will be conducted by appropriately trained study researchers,  
 11 overseen by a neuropsychologist. Cognitive function will be assessed using gold-standard pen  
 12 and paper neuropsychological tests, alongside computerised testing of measures such as  
 13 reaction times and processing speed via an established platform 'Cognitron'<sup>33</sup>. Tests are  
 14 designed to map a range of areas including premorbid functioning, memory, processing  
 15 speed, executive functioning, and performance validity (Table 5).

16  
 17 **Table 5. ADVANCE-TBI Neuropsychological Testing**

| Neuropsychological test                                                          | Domain                                                                                             |
|----------------------------------------------------------------------------------|----------------------------------------------------------------------------------------------------|
| Test of Premorbid Functioning <sup>34</sup>                                      | Establish baseline IQ                                                                              |
| Delis-Kaplan Executive Function System Stroop <sup>35</sup>                      | Executive function                                                                                 |
| Trail Making Test <sup>36</sup>                                                  | Executive function, processing speed                                                               |
| Repeatable Battery for the Assessment of Neuropsychological Status <sup>37</sup> | Range of domains including: immediate memory, delayed memory, visuospatial, language and attention |
| The Dot Counting test <sup>38</sup>                                              | Performance validity                                                                               |
| Simple reaction time, via tablet PC, Cognitron testing platform <sup>39</sup>    | Reaction time                                                                                      |
| Choice reaction time, via tablet PC, Cognitron testing platform <sup>39</sup>    | Processing speed                                                                                   |

18

1 The ADVANCE study routinely ascertains validated questionnaires to assess for a range of  
 2 symptoms relevant to the chronic phase after TBI. A broad range of post-concussion  
 3 symptoms are assessed using the Rivermead questionnaire<sup>40</sup> and we will acquire information  
 4 on sleep quality using the Insomnia Severity Index<sup>41</sup>. Neuropsychiatric symptoms, including  
 5 anxiety (using the GAD 7 questionnaire<sup>42</sup>), post-traumatic stress symptoms (PCL 5  
 6 questionnaire<sup>43</sup>). Health-related quality of life will be assessed using the validated EQ 5D 5L  
 7 questionnaire<sup>44</sup> which assesses five dimensions, spanning mobility, self-care, usual activities,  
 8 pain/discomfort and anxiety/ depression. These measures are collected at present within the  
 9 core ADVANCE study (Table 6).

11 **Table 6. Questionnaire Data**

| Questionnaire                                                 | Role                           |
|---------------------------------------------------------------|--------------------------------|
| The Ohio State Method <sup>32</sup>                           | Head injury exposure history   |
| Rivermead questionnaire <sup>40</sup>                         | Post-concussion symptoms       |
| Generalised anxiety disorder assessment (GAD 7) <sup>42</sup> | Anxiety symptoms               |
| Insomnia Severity Index (ISI) <sup>41</sup>                   | Sleep problems                 |
| PTSD checklist for DSM 5 (PCL 5) <sup>43</sup>                | Post-traumatic stress symptoms |
| EQ 5D 5L questionnaire <sup>44</sup>                          | Health-related quality of life |

14 *Cognition: Neuropsychological performance across pen and paper testing, and computerised*  
 15 *measures*

16 We will assess baseline IQ using the test of premorbid functioning. We will use the Delis-  
 17 Kaplan Executive Function System (DKEFS) Stroop test and Trail Making test to assess  
 18 executive function. The Pearson Repeatable Battery for the Assessment of  
 19 Neuropsychological Status (RBANS) test<sup>37</sup> will be used to assess a range of cognitive domains,  
 20 including memory, delay recall, visuospatial, language and attentional performance. The Dot  
 21 Counting test will be used to assess performance validity.<sup>38</sup> Two tests will be undertaken using

1 a computerised platform 'Cognitron' on an Apple iPad system<sup>39</sup>. These are the simple reaction  
2 time test, and choice reaction team, providing reaction time and processing speed measures.

3

#### 4 **Analysis Overview**

5 *Neuroimaging: white matter injury ascertainment using diffusion tensor imaging MRI and*  
6 *diffuse vascular injury on susceptibility weighted imaging*

7 We will use neuroimaging to identify white matter abnormalities associated with diffuse  
8 axonal and diffuse vascular injury. Standard approaches such as tract-based spatial statistic  
9 (FSL) will be used to generate measures of white matter integrity voxelwise for study  
10 participants undergoing imaging, generating measures such as fractional anisotropy (FA).<sup>45</sup>  
11 We will perform voxelwise analyses to identify regions of significantly different FA related to  
12 TBI exposure.

13 As previously described, using healthy age-matched controls with no history of frontline  
14 military service for comparison, we will produce individual-level white matter DTI  
15 assessments for ADVANCE participants. This pipeline involves FA assessment within regions  
16 previously shown to be sensitive to trauma-related damage, including whole brain white  
17 matter skeleton, body, genu and splenium of the corpus callosum, the corona radiata (left  
18 and right), corticospinal tracts, inferior longitudinal fasciculi, and middle cerebellar  
19 peduncles.<sup>15</sup> Susceptibility weighted imaging will be used to identify trauma-related diffuse  
20 vascular injury.<sup>46</sup> A neuroradiologist will report the scans and comment on any abnormalities,  
21 including microhaemorrhage burden.

22  
23 *Neuroimaging: brain atrophy rate, determined by brain volume change on serial volumetric*  
24 *MRI*

25 Neurodegeneration can be sensitively measured with volumetric T1 MRI, with atrophy  
26 measures shown to correspond to neuronal numbers.<sup>47</sup> Longitudinal methods provide the  
27 means to look sensitively for progression over time.<sup>17</sup> Standard tools such as SPM (UCL) will

1 be used to segment structural T1 images and calculate volumes of grey matter, white matter  
2 and cerebrospinal fluid (CSF) for each individual at each scanning timepoint. Volumes of grey  
3 matter (GM), white matter (WM), and CSF (CSF) will be normalised for head size as needed  
4 by dividing each by total intracranial volume (defined as GM+WM+CSF).

5 To assess for longitudinal changes in brain volume we will use standard approaches such as  
6 SPM 12 for longitudinal pairwise registration, whereby each patient's baseline scan is  
7 iteratively co-registered to the follow-up image.<sup>48</sup> The resulting deformations divided by the  
8 inter-scan time interval, are captured in a Jacobian determinant rate map. By registering  
9 individual temporal-average space images to standard space (e.g. MNI152), we will be able to  
10 undertake voxelwise group-level contrasts (FSL randomise), including between participants  
11 with and without TBI.

### 12 13 *Neuroimaging: brain network changes on resting state functional MRI*

14 We will use functional MRI to investigate brain network function. Brain-activation related  
15 changes in cerebral blood flow can be assessed using functional MRI via the blood oxygen level  
16 dependent (BOLD) signal. Functional connectivity, reflecting both regional activation and the  
17 interaction of brain regions within a network, relates to brain structure (as above), is sensitive  
18 to TBI-related damage and can be assessed at rest using standard approaches: we have  
19 previously used this approach to demonstrate persistent changes in brain network functional  
20 connectivity after TBI.<sup>49</sup> Similar approaches will be employed to test whether battlefield  
21 exposure is associated with persistent changes in brain network function.

### 22 23 *Fluid biomarkers: blood concentrations of neurodegeneration markers neurofilament light* 24 *(NfL) and glial fibrillary acidic protein (GFAP), with exploratory analyses of amyloid beta 1-42* 25 *and 1-40, ptau181 and total tau*

26 Plasma has been taken at the baseline visit for >1100 participants in ADVANCE and thus far a  
27 substantial proportion of the cohort have undergone their 3-year longitudinal follow-up visit  
28 with further plasma sampling. This will continue longitudinally at each ADVANCE study visit.

1  
2  
3 1 We will use a digital ELISA platform, specifically the single molecular array system (SiMoA)  
4 (Quanterix, MA) <sup>50</sup> to provide attomolar ( $10^{-15}$ ) quantification of fluid biomarkers. We will  
5 2  
6 3 assess the relationship between plasma concentrations of NfL and GFAP and injury exposure  
7 4  
8 5 using linear models. In exploratory analyses we will also investigate the relationship between  
9 6  
10 7 injury and plasma concentrations of amyloid beta 1-42, amyloid beta 1-40, total tau and  
11 8  
12 9 phospho-tau 181. Other plasma biomarkers of brain injury and neurodegeneration will be  
13 10  
14 11 analysed in the future as they are developed. Analyses will be performed in keeping with  
15 12  
16 13 standard operating procedures, set out in the relevant laboratory manuals.  
17 14  
18 15  
19 16  
20 17  
21 18  
22 19  
23 20  
24 21  
25 22  
26 23  
27 24  
28 25  
29 26  
30 27  
31 28  
32 29  
33 30  
34 31  
35 32  
36 33  
37 34  
38 35  
39 36  
40 37  
41 38  
42 39  
43 40  
44 41  
45 42  
46 43  
47 44  
48 45  
49 46  
50 47  
51 48  
52 49  
53 50  
54 51  
55 52  
56 53  
57 54  
58 55  
59 56  
60 57

### 10 *Fluid biomarkers: proteomic profile associated with traumatic brain injury*

11 The Somalogic proteomics discovery platform providing aptamer-based quantification of  
12 >7000 proteins is being performed on baseline blood samples from the ADVANCE cohort  
13 within the core ADVANCE study. We will (1) describe the plasma concentrations of, and assess  
14 the correlation between fluid biomarkers measured on the Simoa platform and the Somalogic  
15 platform (specifically NfL, GFAP and total tau); (2) assess for proteomic evidence of  
16 neurodegeneration and inflammation which is specific to battlefield TBI, involving  
17 comparison of NfL, GFAP, IL6:IL10, IFN $\gamma$ :IL10 and TNF $\alpha$ :IL10 ratio in patients with and without  
18 TBI (3) perform data-driven determination of clusters associated with brain injury in trauma  
19 patients to assess which groups of co-correlating proteins maximally differentiate individuals  
20 with and without TBI in those exposed to battlefield trauma, using cluster and factor analysis  
21 approaches; (4) assess which proteomic markers are closely correlated with our core  
22 candidate markers of neurodegeneration (NfL, GFAP) in patients with TBI; (5) assess the  
23 relative contribution of injury and inflammation to autonomic dysfunction after TBI, using  
24 measures such as heart rate variability (assessed using the Vicorder system, Skidmore  
25 Medical, UK) alongside proteomic markers and lastly (6); assess how accelerated biological  
26 aging contributes to the chronic consequences of TBI, and if so, to what extent this is  
27 modulated by inflammation.

28



1  
2  
3 1 *Assessment of interaction between neurodegenerative genotype (APOE4, AD PRS), TBI status,*  
4 *and outcome measures including fluid biomarkers, brain atrophy, and symptom burden*  
5  
6  
7

8 3 Whole blood was sampled at the ADVANCE study baseline visit. Consent and ethical approval  
9 are place for genotyping and further analyses. Extraction and microarray analysis: DNA will  
10 4 are place for genotyping and further analyses. Extraction and microarray analysis: DNA will  
11 5 be extracted and SNP assessment will be performed using Illumina Global Screening Array.  
12 6 We will use the Illumina Neuro Consortium Array in addition, comprising an additional ~75K  
13 7 SNPs for variants associated with AD, Parkinson's and frontotemporal dementia.<sup>51</sup> Individuals  
14 8 and variants with a low call rate will be excluded from further analyses. We will also perform  
15 9 quality checks for genetic sex and remove individuals with a high degree of relatedness, and  
16 10 will check for ancestry using principal component analysis. The derived subpopulation  
17 11 structure in our data will be assessed against reference populations (e.g. UK Biobank) and  
18 12 non-Caucasian participants analysed separately.

19 13 To increase power and improve signal resolution while limiting the genotyping costs, datasets  
20 14 will be harmonised, phased and imputed with the Next-Generation Genotype Imputation  
21 15 Service, facilitating prediction of SNPs that have not been directly tested (matching measured  
22 16 to reference haplotypes). In order to understand the relative contribution of the *APOE*  
23 17 Alzheimer's disease risk allele, status will be imputed using standard microarray approaches  
24 18 to assess single nucleotide polymorphisms rs429358 and rs7412 and data will undergo QC as  
25 19 recently described.<sup>52</sup> Individual PRSs will be generated as sums of the risk alleles weighted by  
26 20 SNP effect sizes from the most recent AD GWAS.<sup>53</sup> SNPs will be selected on a threshold of  $p \leq$   
27 21 0.5 for AD.<sup>25,52,54</sup> SNPs will be excluded if they have a linkage disequilibrium  $r^2 > 0.1$  with the  
28 22 most associated SNP in a 1megabase region. The PRS will be standardised using appropriate  
29 23 population cohorts. In exploratory work, we will assess for mutations in Wallerian  
30 24 degeneration pathways which might affect neurodegeneration after injury, particularly in the  
31 25 sterile alpha and Toll/interleukin-1 receptor motif-containing 1 *SARM1* gene.

32  
33  
34  
35  
36  
37  
38  
39  
40  
41  
42  
43  
44  
45  
46  
47  
48  
49  
50  
51  
52 26

53  
54  
55 27 **Statistical analysis plan**  
56

57 28 Across the different strands of work, data inspection and the Kolmogorov-Smirnov test will  
58 29 be used to assess normality of all continuous data. Group-level continuous data will be  
59  
60

1 compared using the unpaired t-test for normally distributed data and the Wilcoxon test for  
2 non-parametric data. Analysis of variance will be used for three way comparisons. In addition,  
3 effect sizes and confidence intervals will be reported. Spearman's rank correlation will be  
4 used to assess correlations between Simoa and Somalogic biomarkers.

5 Multivariable linear regression will be used to develop a prediction model for  
6 neurodegeneration outcome measures such as brain atrophy rates, fluid biomarkers (GFAP  
7 and NfL), cognition and neuropsychiatric symptom burden. Models will include putative  
8 predictors whose influence will be explored including exposure to TBI (including severity,  
9 number of TBIs), cardiovascular status (e.g. indexed by arterial stiffness measures collected  
10 in ADVANCE such as pulse wave velocity, or scores such as QRISK<sup>55</sup>), genetic risk for AD, age,  
11 and time since injury. This relates to hypotheses (1) and (5), involving outcome prediction.

12 Multivariable linear (or logistic, for categorical measures, as appropriate) regression models  
13 will be used to test the association between exposure and outcomes, adjusting a priori for  
14 confounders. We will test the effects of non-index injuries. This approach will be used to test  
15 associations described in hypotheses (1), (2), (3), (4), (5), (6) and (7).

16 Linear mixed effects models will be used to analyse time-course data such as longitudinally  
17 collected biomarker data (fixed effects) accounting within individual (random effects)  
18 repeated measures. We will account for confounders including rank as a surrogate of  
19 socioeconomic status, and age.

20 A two tailed P value <0.05 will be considered statistically significant for all comparisons,  
21 except where a strong prior hypothesis exists to justify one-tail testing (e.g. brain volume loss,  
22 rather than expansion, over time after TBI).

## 23 24 **Limitations**

25 There may be loss to follow-up over the course of the study. However, we do not feel that  
26 this will significantly impair our ability to address the core research questions or hypotheses  
27 and our group size will likely be well in excess of 500 participants at 20 years. We will test for

1 the imbalances in the data at each timepoint due to loss to follow-up and may use statistical  
2 approaches such as weighted analyses to account for this, if appropriate.

3 Missing data will be handled by multiple imputation where appropriate. Where assumptions  
4 are violated other missing data imputation methods will be considered. Where the number  
5 of missing data is small, complete case analysis will be used.

6 Inclusion and exclusion criteria were defined at the establishment of the over-arching  
7 ADVANCE study. Female service personnel were not included due to the relatively small  
8 numbers of female combat trauma casualties during the Afghanistan campaign. As the  
9 primary focus of ADVANCE was originally to clarify long-term cardiovascular outcomes of  
10 injury, a decision was taken to exclude people with pre-existing cardiovascular disease (eg.  
11 diabetes), age-related vascular change (eg. those aged >50 years initially) or active infection  
12 at the time of recruitment (which could perturb physiological measurements). As the cohort  
13 has already been established, it is not feasible to deviate from these established criteria for  
14 sub-studies such as ADVANCE-TBI. While these criteria reduce the representativeness of the  
15 cohort in relation to the military population, we expect that the study will provide scientific  
16 insights which will be more widely generalisable.

## 17 18 **Patient and Public Involvement**

19 The proposed work has been discussed and formulated with the ADVANCE participant group  
20 where there was widespread enthusiasm for the study, and agreement that the research set  
21 out in this protocol is needed, acceptable to the participants and feasible to perform.

## 22 23 **Ethics and Dissemination**

24 The relevant ethical approvals have been granted by the Ministry of Defence Ethics  
25 Committee (MODREC) (REF:2126MODREC22). The study will be performed in accordance  
26 with the recommendations guiding ethical research involving human subjects adopted by the  
27 18th World Medical Association General Assembly, Helsinki, Finland, June 1964, amended at

1 the 64th World Medical Association General Assembly, Fortaleza, Brazil, October 2013. The  
2 study will have minimal risk to the participants. Normal safety procedures including standard  
3 MRI safety checks (e.g. for ferromagnetic metal in the body) will be carried out prior to scans  
4 to minimise risk. MRI may be claustrophobic, and loud for some participants. Participants will  
5 be made as comfortable as possible and will be able to communicate with the radiographer  
6 throughout the scan. Should the participant wish to not continue, the scan will be stopped  
7 immediately.

8

### 9 **Dissemination strategy**

10 Study findings will be disseminated through participant and stakeholder communications  
11 such as the regular ADVANCE participant newsletter and website, and more broadly via  
12 manuscripts in peer reviewed journals and presentations at scientific conferences.

13

### 14 **Data sharing**

15 ADVANCE-TBI is an integral component of the broader ADVANCE study, hence the data  
16 obtained from the study will form part of the wider ADVANCE database and shall be shared  
17 among appropriate researchers upon reasonable request.

18

### 19 **Contributorship statement**

20 DJS, AB, PC, CJB, NTF, NSNG and KAZ were involved in the design and conception of the study  
21 and protocol. The first draft was prepared by GB and NSNG. DJS, AB, KAZ and SS revised initial  
22 iterations. SS provided statistical review. NSNG, GB, KAZ, DF, MD, EC, AH, HZ, VE, SS, NTF, CJB,  
23 AMJB, PC, AB and DJS reviewed and approved the final version of the manuscript.

24

### 25 **Competing interests**

1 HZ has served at scientific advisory boards and/or as a consultant for Abbvie, Alektor,  
2 ALZPath, Annexon, Apellis, Artery Therapeutics, AZTherapies, CogRx, Denali, Eisai, Nervgen,  
3 Novo Nordisk, Pinteon Therapeutics, Red Abbey Labs, reMYND, Passage Bio, Roche,  
4 Samumed, Siemens Healthineers, Triplet Therapeutics, and Wave, has given lectures in  
5 symposia sponsored by Cellectricon, Fujirebio, Alzecure, Biogen, and Roche, and is a co-  
6 founder of Brain Biomarker Solutions in Gothenburg AB (BBS), which is a part of the GU  
7 Ventures Incubator Program (outside submitted work). DJS provides medicolegal services and  
8 serves on the Rugby Football Union concussion advisory board.

#### 10 **Funding statement**

11 ADVANCE-TBI is funded by the ADVANCE Charity (award/grant number NA). Key contributors  
12 to the ADVANCE charity include Headley Court Charity (principal funder), HM Treasury (LIBOR  
13 Grant), Help for Heroes, Nuffield Trust for the Forces of the Crown, Forces in Mind Trust,  
14 National Lottery Community Fund, Blesma—The Limbless Veterans and the UK Ministry of  
15 Defence (award/grant number NA).

#### 17 **License statement**

18 The Submitting Author accepts and understands that any supply made under these terms is  
19 made by BMJ to the Submitting Author unless you are acting as an employee on behalf of  
20 your employer or a postgraduate student of an affiliated institution which is paying any  
21 applicable article publishing charge (“APC”) for Open Access articles. Where the Submitting  
22 Author wishes to make the Work available on an Open Access basis (and intends to pay the  
23 relevant APC), the terms of reuse of such Open Access shall be governed by a Creative  
24 Commons licence – details of these licences and which [Creative Commons](#) licence will apply  
25 to this Work are set out in our licence referred to above.

## References

1. Maas AIR, Menon DK, Adelson PD, et al. Traumatic brain injury: integrated approaches to improve prevention, clinical care, and research. *Lancet Neurol*. Dec 2017;16(12):987-1048. doi:10.1016/S1474-4422(17)30371-X
2. Vos T, Lim SS, Abbafati C, et al. Global burden of 369 diseases and injuries in 204 countries and territories, 1990–2019: a systematic analysis for the Global Burden of Disease Study 2019. *The Lancet*. 2020;396(10258):1204-1222. doi:10.1016/S0140-6736(20)30925-9
3. Goldstein LE, Fisher AM, Tagge CA, et al. Chronic traumatic encephalopathy in blast-exposed military veterans and a blast neurotrauma mouse model. Research Support, N.I.H., Extramural Research Support, Non-U.S. Gov't Research Support, U.S. Gov't, Non-P.H.S. *Science translational medicine*. May 16 2012;4(134):134ra60. doi:10.1126/scitranslmed.3003716
4. Rona RJ, Jones M, Fear NT, et al. Mild Traumatic Brain Injury in UK Military Personnel Returning From Afghanistan and Iraq: Cohort and Cross-sectional Analyses. *The Journal of Head Trauma Rehabilitation*. 2012;27(1):33-44. doi:10.1097/HTR.0b013e318212f814
5. Tanielian T, Jaycox HL. *Invisible Wounds of War Psychological and Cognitive Injuries, Their Consequences, and Services to Assist Recovery*. . 2008:1–499. RAND Centre for Military Health Policy Research
6. Zamorski MA, Boulos D. The impact of the military mission in Afghanistan on mental health in the Canadian Armed Forces: a summary of research findings. *Eur J Psychotraumatol*. 2014;5doi:10.3402/ejpt.v5.23822
7. Hooff MV, Saccone L, Clark L, Tran T, McFarlane A. *Mild Traumatic Brain Injury (MTBI) in the Australian Defence Force: Results from the 2010 ADF Mental Health Prevalence and Wellbeing Dataset (Monthly Report)*. 2010. [https://www.defence.gov.au/sites/default/files/doc/files/2010\\_ADF\\_Mental\\_Health\\_Prevalence\\_Wellbeing\\_results\\_0.pdf](https://www.defence.gov.au/sites/default/files/doc/files/2010_ADF_Mental_Health_Prevalence_Wellbeing_results_0.pdf)
8. Penn-Barwell JG, Roberts SA, Midwinter MJ, Bishop JR. Improved survival in UK combat casualties from Iraq and Afghanistan: 2003-2012. *J Trauma Acute Care Surg*. May 2015;78(5):1014-20. doi:10.1097/TA.0000000000000580
9. McMillan TM, Teasdale GM, Weir CJ, Stewart E. Death after head injury: the 13 year outcome of a case control study. *J Neurol Neurosurg Psychiatry*. Aug 2011;82(8):931-5. doi:10.1136/jnnp.2010.222232
10. Li Y, Li Y, Li X, et al. Head Injury as a Risk Factor for Dementia and Alzheimer's Disease: A Systematic Review and Meta-Analysis of 32 Observational Studies. *PLoS One*. 2017;12(1):e0169650. doi:10.1371/journal.pone.0169650
11. Leung KK, Carr FM, Russell MJ, Bremault-Phillips S, Triscott JAC. Traumatic brain injuries among veterans and the risk of incident dementia: A systematic review & meta-analysis. *Age and Ageing*. 2022;51(1):afab194. doi:10.1093/ageing/afab194
12. Priemer DS, Iacono D, Rhodes CH, Olsen CH, Perl DP. Chronic Traumatic Encephalopathy in the Brains of Military Personnel. *N Engl J Med*. Jun 9 2022;386(23):2169-2177. doi:10.1056/NEJMoa2203199
13. Goldstein LE, Fisher AM, Tagge CA, et al. Chronic traumatic encephalopathy in blast-exposed military veterans and a blast neurotrauma mouse model. *Sci Transl Med*. May 16 2012;4(134):134ra60. doi:10.1126/scitranslmed.3003716
14. Graham NS, Sharp DJ. Understanding neurodegeneration after traumatic brain injury: from mechanisms to clinical trials in dementia. *J Neurol Neurosurg Psychiatry*. Sep 21 2019;doi:10.1136/jnnp-2017-317557
15. Jolly AE, Balaet M, Azor A, et al. Detecting axonal injury in individual patients after Traumatic Brain Injury. *Brain*. 2021;144(1):92-113. doi:10.1093/brain/awaa372

16. Munivenkatappa A, Bhagavatula ID, Shukla DP, Rajeswaran J. A longitudinal study of changes in Diffusion Tensor Value and their association with cognitive sequelae among patients with mild head injury. *J Neurosurg Sci*. Jun 2017;61(3):283-290. doi:10.23736/s0390-5616.16.03112-x
17. Cole JH, Jolly A, de Simoni S, et al. Spatial patterns of progressive brain volume loss after moderate-severe traumatic brain injury. *Brain*. Mar 1 2018;141(3):822-836. doi:10.1093/brain/awx354
18. Graham NSN, Zimmerman KA, Moro F, et al. Axonal marker neurofilament light predicts long-term outcomes and progressive neurodegeneration after traumatic brain injury. *Science Translational Medicine*. 2021;13(613):eabg9922. doi:10.1126/scitranslmed.abg9922
19. Shahim P, Politis A, van der Merwe A, et al. Time course and diagnostic utility of NfL, tau, GFAP, and UCH-L1 in subacute and chronic TBI. *Neurology*. 2020;95(6):e623-e636. doi:10.1212/wnl.00000000000009985
20. Graham NS, Zimmerman KA, Bertolini G, et al. Multicentre longitudinal study of fluid and neuroimaging BIOMarkers of AXonal injury after traumatic brain injury: the BIO-AX-TBI study protocol. *BMJ Open*. 2020;10(11):e042093. doi:10.1136/bmjopen-2020-042093
21. Newcombe VFJ, Ashton NJ, Posti JP, et al. Post-acute blood biomarkers and disease progression in traumatic brain injury. *Brain*. 2022;145(6):2064-2076. doi:10.1093/brain/awac126
22. McFadyen CA, Zeiler FA, Newcombe V, et al. Apolipoprotein E4 Polymorphism and Outcomes from Traumatic Brain Injury: A Living Systematic Review and Meta-Analysis. *J Neurotrauma*. Apr 15 2021;38(8):1124-1136. doi:10.1089/neu.2018.6052
23. Sundstrom A, Nilsson LG, Cruts M, Adolfsson R, Van Broeckhoven C, Nyberg L. Increased risk of dementia following mild head injury for carriers but not for non-carriers of the APOE epsilon4 allele. *Int Psychogeriatr*. Feb 2007;19(1):159-65. doi:10.1017/S1041610206003498
24. Hayes JP, Logue MW, Sadeh N, et al. Mild traumatic brain injury is associated with reduced cortical thickness in those at risk for Alzheimer's disease. *Brain*. Mar 1 2017;140(3):813-825. doi:10.1093/brain/aww344
25. Escott-Price V, Sims R, Bannister C, et al. Common polygenic variation enhances risk prediction for Alzheimer's disease. *Brain*. Dec 2015;138(Pt 12):3673-84. doi:10.1093/brain/awv268
26. Bennett AN, Dyball DM, Boos CJ, et al. Study protocol for a prospective, longitudinal cohort study investigating the medical and psychosocial outcomes of UK combat casualties from the Afghanistan war: the ADVANCE Study. *BMJ Open*. Oct 30 2020;10(10):e037850. doi:10.1136/bmjopen-2020-037850
27. Boos CJ, Schofield S, Cullinan P, et al. Association between combat-related traumatic injury and cardiovascular risk. *Heart*. Mar 2022;108(5):367-374. doi:dx.doi.org/10.1136/heartjnl-2021-320296
28. Dyball D, Bennett AN, Schofield S, et al. Mental health outcomes of male UK military personnel deployed to Afghanistan and the role of combat injury: analysis of baseline data from the ADVANCE cohort study. *Lancet Psychiat*. Jul 2022;9(7):547-554. doi:10.1016/s2215-0366(22)00112-2
29. Graham NSN, Jolly A, Zimmerman K, et al. Diffuse axonal injury predicts neurodegeneration after moderate-severe traumatic brain injury. *Brain*. 2020;doi:10.1093/brain/awaa316
30. Malec JF, Brown AW, Leibson CL, et al. The mayo classification system for traumatic brain injury severity. *J Neurotrauma*. Sep 2007;24(9):1417-24. doi:10.1089/neu.2006.0245
31. Grinnon ST, Miller K, Marler JR, et al. National Institute of Neurological Disorders and Stroke Common Data Element Project - approach and methods. *Clin Trials*. Jun 2012;9(3):322-9. doi:10.1177/1740774512438980
32. Corrigan JD, Bogner J. Initial reliability and validity of the Ohio State University TBI Identification Method. *J Head Trauma Rehabil*. Nov-Dec 2007;22(6):318-29. doi:10.1097/01.Htr.0000300227.67748.77
33. Hampshire A, Trender W, Chamberlain SR, et al. Cognitive deficits in people who have recovered from COVID-19. *EClinicalMedicine*. 2021/09/01/ 2021;39:101044. doi:<https://doi.org/10.1016/j.eclinm.2021.101044>

- 1  
2  
3 1 34. Pearson. *Advanced Clinical Solutions for WAIS-IV and WMS-IV*. The Psychological  
4 2 Corporation; 2009.  
5 3 35. Delis D, Kaplan E, Kramer J. *Delis-Kaplan executive function system*. The Psychological  
6 4 Corporation; 2001.  
7 5 36. Reitan RM. Validity of the Trail Making Test as an Indicator of Organic Brain Damage.  
8 6 *Perceptual and Motor Skills*. 1958;8(3):271-276. doi:10.2466/pms.1958.8.3.271  
9 7 37. Randolph C, Tierney MC, Mohr E, Chase TN. The Repeatable Battery for the Assessment of  
10 8 Neuropsychological Status (RBANS): preliminary clinical validity. *J Clin Exp Neuropsychol*. Jun  
11 9 1998;20(3):310-9. doi:10.1076/jcen.20.3.310.823  
12 10 38. Booke K, Lu P, Herzberg D. *The dot counting test*. Western Psychological Services; 2002.  
13 11 39. Hampshire A, Trender W, Chamberlain SR, et al. Cognitive deficits in people who have  
14 12 recovered from COVID-19. *EClinicalMedicine*. 2021;39doi:10.1016/j.eclinm.2021.101044  
15 13 40. King NS, Crawford S, Wenden FJ, Moss NEG, Wade DT. The Rivermead Post Concussion  
16 14 Symptoms Questionnaire: a measure of symptoms commonly experienced after head injury and its  
17 15 reliability. *Journal of Neurology*. 1995/09/01 1995;242(9):587-592. doi:10.1007/BF00868811  
18 16 41. Morin CM, Belleville G, Bélanger L, Ivers H. The Insomnia Severity Index: psychometric  
19 17 indicators to detect insomnia cases and evaluate treatment response. *Sleep*. May 1 2011;34(5):601-  
20 18 8. doi:10.1093/sleep/34.5.601  
21 19 42. Spitzer RL, Kroenke K, Williams JB, Löwe B. A brief measure for assessing generalized anxiety  
22 20 disorder: the GAD-7. *Arch Intern Med*. May 22 2006;166(10):1092-7.  
23 21 doi:10.1001/archinte.166.10.1092  
24 22 43. Blevins CA, Weathers FW, Davis MT, Witte TK, Domino JL. The Posttraumatic Stress Disorder  
25 23 Checklist for DSM-5 (PCL-5): Development and Initial Psychometric Evaluation. *J Trauma Stress*. Dec  
26 24 2015;28(6):489-98. doi:10.1002/jts.22059  
27 25 44. Herdman M, Gudex C, Lloyd A, et al. Development and preliminary testing of the new five-  
28 26 level version of EQ-5D (EQ-5D-5L). *Qual Life Res*. Dec 2011;20(10):1727-36. doi:10.1007/s11136-011-  
29 27 9903-x  
30 28 45. Smith SM, Jenkinson M, Johansen-Berg H, et al. Tract-based spatial statistics: voxelwise  
31 29 analysis of multi-subject diffusion data. *Neuroimage*. Jul 15 2006;31(4):1487-505.  
32 30 doi:10.1016/j.neuroimage.2006.02.024  
33 31 46. Jolly AE, Bălăeș M, Azor A, et al. Detecting axonal injury in individual patients after traumatic  
34 32 brain injury. *Brain*. 2020;144(1):92-113. doi:10.1093/brain/awaa372  
35 33 47. Bobinski M, de Leon MJ, Wegiel J, et al. The histological validation of post mortem magnetic  
36 34 resonance imaging-determined hippocampal volume in Alzheimer's disease. *Neuroscience*.  
37 35 2000;95(3):721-5.  
38 36 48. Ashburner J, Ridgway GR. Symmetric diffeomorphic modeling of longitudinal structural MRI.  
39 37 *Front Neurosci*. 2012;6:197. doi:10.3389/fnins.2012.00197  
40 38 49. Sharp DJ, Beckmann CF, Greenwood R, et al. Default mode network functional and structural  
41 39 connectivity after traumatic brain injury. *BRAIN*. // 2011;134:2233-2247. doi:brain/awr175  
42 40 50. Wilson DH, Rissin DM, Kan CW, et al. The Simoa HD-1 Analyzer: A Novel Fully Automated  
43 41 Digital Immunoassay Analyzer with Single-Molecule Sensitivity and Multiplexing. *J Lab Autom*. Aug  
44 42 2016;21(4):533-47. doi:10.1177/2211068215589580  
45 43 51. Blauwendraat C, Faghri F, Pihlstrom L, et al. NeuroChip, an updated version of the NeuroX  
46 44 genotyping platform to rapidly screen for variants associated with neurological diseases. *Neurobiol*  
47 45 *Aging*. Sep 2017;57:247.e9-247.e13. doi:10.1016/j.neurobiolaging.2017.05.009  
48 46 52. Leonenko G, Baker E, Stevenson-Hoare J, et al. Identifying individuals with high risk of  
49 47 Alzheimer's disease using polygenic risk scores. *Nature Communications*. 2021/07/23  
50 48 2021;12(1):4506. doi:10.1038/s41467-021-24082-z  
51 49 53. Kunkle BW, Grenier-Boley B, Sims R, et al. Genetic meta-analysis of diagnosed Alzheimer's  
52 50 disease identifies new risk loci and implicates A $\beta$ , tau, immunity and lipid processing. *Nat Genet*. Mar  
53 51 2019;51(3):414-430. doi:10.1038/s41588-019-0358-2  
54  
55  
56  
57  
58  
59  
60



1  
2  
3 1 54. Escott-Price V, Myers AJ, Huentelman M, Hardy J. Polygenic risk score analysis of  
4 2 pathologically confirmed Alzheimer disease. *Ann Neurol*. Aug 2017;82(2):311-314.  
5 3 doi:10.1002/ana.24999

6 4 55. Hippisley-Cox J, Coupland C, Brindle P. Development and validation of QRISK3 risk prediction  
7 5 algorithms to estimate future risk of cardiovascular disease: prospective cohort study. *BMJ*.  
8 6 2017;357:j2099. doi:10.1136/bmj.j2099  
9 7  
10 8  
11  
12  
13

## 14 9 **Figure Legends**

15  
16 10 **Figure 1. Recruitment within the ADVANCE study.** Cumulative number of patients within the  
17 11 broader ADVANCE study showing date of baseline assessment and first follow-up visit, with  
18 12 patients recruited into ADVANCE-TBI in green.  
19  
20  
21  
22  
23  
24  
25  
26  
27  
28  
29  
30  
31  
32  
33  
34  
35  
36  
37  
38  
39  
40  
41  
42  
43  
44  
45  
46  
47  
48  
49  
50  
51  
52  
53  
54  
55  
56  
57  
58  
59  
60

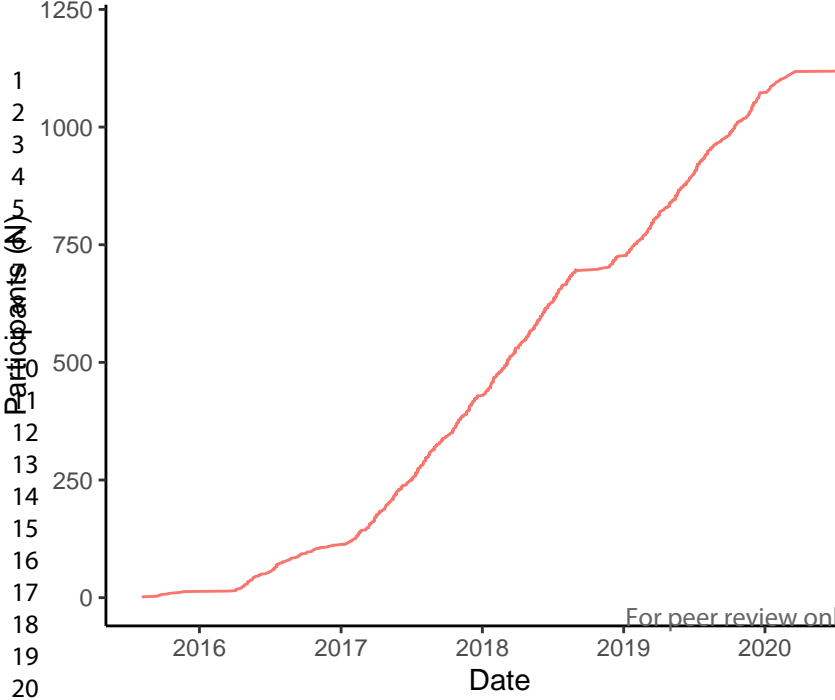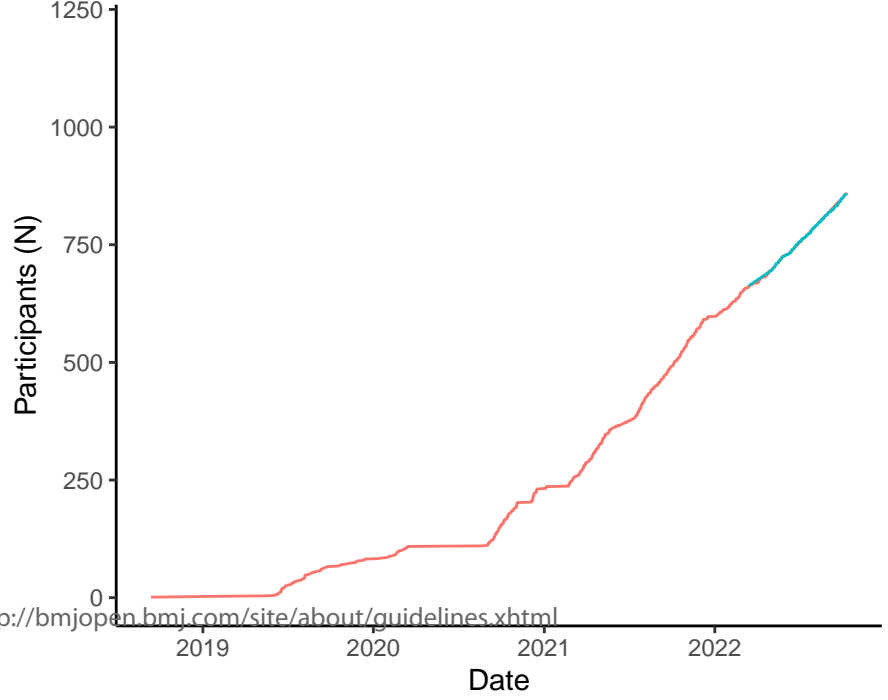

— ADVANCE-Core  
— ADVANCE-TBI
